# Supplementary material for: Immunogenicity, effectiveness, and safety of measles vaccination in infants younger than 9 months: a systematic review and meta-analysis
Source: PubMed Central journal article supplement — Lancet Infect Dis. 2019 Nov;19(11):1235–45. doi: 10.1016/S1473-3099(19)30395-0 (PMC6838664; doi:10.1016/s1473-3099(19)30395-0), 2019-11
Supplement: mmc1.pdf [file mmc1.pdf]

# THE LANCET Infectious Diseases

## Supplementary webappendix

This webappendix formed part of the original submission and has been peer reviewed. We post it as supplied by the authors.

Supplement to: Nic Lochlainn LM, de Gier B, van der Maas N, et al. Immunogenicity, effectiveness, and safety of measles vaccination in infants younger than 9 months: a systematic review and meta-analysis. *Lancet Infect Dis* 2019; published online Sept 20. [https://doi.org/10.1016/S1473-3099\(19\)30395-0](https://doi.org/10.1016/S1473-3099(19)30395-0).

**Supplementary webappendix for:**

**Immunogenicity, effectiveness, and safety of measles vaccination in infants younger than 9 months: a systematic review and meta-analysis**

**Table of Contents**

Database search strategy ..... 2

Decision rules for data selection and extraction processes ..... 8

    Eligibility criteria ..... 8

    Exclusion criteria ..... 8

Definitions of seroconversion accepted for inclusion in the review ..... 9

Definitions of seroconversion not accepted for inclusion in the review ..... 10

Characteristics of studies included in the review by outcome ..... 11

Proportion seroconverted by age of MCV1 (4-8 months) and measles vaccine strain..... 15

Forest plots for seroconversion ..... 17

Proportion seroconverted, pooled estimates per single ages and age ranges ..... 22

Univariable meta-regression results for seroconversion ..... 24

Multivariable meta-regression results for seroconversion ..... 25

Proportion seroconverted head-to-head comparison of 6-month-old infants vaccinated with Schwarz or Edmonston-Zagreb ..... 26

Forest plot with geometric mean titre (GMT) results from plaque reduction neutralization testing (PRNT) with accompanying confidence intervals or standard errors following MCV1 <9 months of age ..... 27

Forest plots for safety ..... 28

GRADE summary of evidence table..... 33

Multivariable meta-regression results for seroconversion in the absence or presence of maternal antibodies ..... 35

## Database search strategy

**Table 1: Database search strategy, search conducted 2 June 2015 and updated 14 January 2019**

| Database               | Strategy                                                                                                                                                                                                                                                                                                                                                                                                                                                                                                                                                                                                                                                                                                                                                                                                                                                                                                                                                                                                                                                                                                                                                                                                                                                                                                                                                                                                                                                                                                                                                                                                                                                                                                                                                                                                                                                                                                                                                                                                                                                                                                                                                                                                                                                                                                                                                                                                                                                                                                                                                                                                                                                                                                                                                                                                                                                                                                                                                                                                                                                                                                                                                                                                                                                                                                                                                                                                                                                                                                                                                                                                                                                                                                                                                                                                                                                                                                                                                                                                                                                                                                                                                                                                                                                                                                                                                                                                                                                                                                                                                                                                                                                                                                                                                                                                                                                                                                                                                                                                                                                                                                                                                                                                                                                                                                                                                                                                                                                                                                                                                                                             |
|------------------------|------------------------------------------------------------------------------------------------------------------------------------------------------------------------------------------------------------------------------------------------------------------------------------------------------------------------------------------------------------------------------------------------------------------------------------------------------------------------------------------------------------------------------------------------------------------------------------------------------------------------------------------------------------------------------------------------------------------------------------------------------------------------------------------------------------------------------------------------------------------------------------------------------------------------------------------------------------------------------------------------------------------------------------------------------------------------------------------------------------------------------------------------------------------------------------------------------------------------------------------------------------------------------------------------------------------------------------------------------------------------------------------------------------------------------------------------------------------------------------------------------------------------------------------------------------------------------------------------------------------------------------------------------------------------------------------------------------------------------------------------------------------------------------------------------------------------------------------------------------------------------------------------------------------------------------------------------------------------------------------------------------------------------------------------------------------------------------------------------------------------------------------------------------------------------------------------------------------------------------------------------------------------------------------------------------------------------------------------------------------------------------------------------------------------------------------------------------------------------------------------------------------------------------------------------------------------------------------------------------------------------------------------------------------------------------------------------------------------------------------------------------------------------------------------------------------------------------------------------------------------------------------------------------------------------------------------------------------------------------------------------------------------------------------------------------------------------------------------------------------------------------------------------------------------------------------------------------------------------------------------------------------------------------------------------------------------------------------------------------------------------------------------------------------------------------------------------------------------------------------------------------------------------------------------------------------------------------------------------------------------------------------------------------------------------------------------------------------------------------------------------------------------------------------------------------------------------------------------------------------------------------------------------------------------------------------------------------------------------------------------------------------------------------------------------------------------------------------------------------------------------------------------------------------------------------------------------------------------------------------------------------------------------------------------------------------------------------------------------------------------------------------------------------------------------------------------------------------------------------------------------------------------------------------------------------------------------------------------------------------------------------------------------------------------------------------------------------------------------------------------------------------------------------------------------------------------------------------------------------------------------------------------------------------------------------------------------------------------------------------------------------------------------------------------------------------------------------------------------------------------------------------------------------------------------------------------------------------------------------------------------------------------------------------------------------------------------------------------------------------------------------------------------------------------------------------------------------------------------------------------------------------------------------------------------------------------------------------------------|
| <b>PubMed, MEDLINE</b> | <p>1 ((measles[ti] OR mmr*[ti] OR schwarz[ti] OR moraten[ti] OR edmonston[ti] OR edmonston-zagreb[ti] OR Leningrad-16[ti] OR Shanghai-191[ti] OR CAM-70[ti] OR AIK-C[ti] OR TD97[ti]) AND (vaccine*[ti] OR vaccination*[ti] OR immunization*[ti] OR immunisation*[ti])) OR (mr vaccine*[ti] OR mmrv[ti]) 4.787</p> <p>2 "measles vaccine"[mj] OR "measles-mumps-rubella vaccine"[mj] OR ("measles vaccine"[mh] AND ("vaccination"[mj] OR "immunization programs"[mjj])) 6.215</p> <p>3 ("measles virus/immunology"[mj] OR "measles/immunology"[mjj]) and ("vaccination"[mh] OR "immunization schedule"[mh]) 558</p> <p>4 #1 OR #2 OR #3 7.292</p> <p>5 "9 months"[tiab] 48.137</p> <p>6 "0 month"[tiab] OR "1 month"[tiab] OR "2 month"[tiab] OR "3 month"[tiab] OR "4 month"[tiab] OR "5 month"[tiab] OR "6 month"[tiab] OR "7 month"[tiab] OR "8 month"[tiab] OR "9 months"[tiab] OR "1 months"[tiab] OR "2 months"[tiab] OR "3 months"[tiab] OR "4 months"[tiab] OR "5 months"[tiab] OR "6 months"[tiab] OR "7 months"[tiab] OR "8 months"[tiab]</p> <p>7 "1-2 month"[tiab] OR "1-3 month"[tiab] OR "1-4 month"[tiab] OR "1-5 month"[tiab] OR "1-6 month"[tiab] OR "1-7 month"[tiab] OR "1-8 month"[tiab] OR "1-9 month"[tiab] OR "1-10 month"[tiab] OR "1-11 month"[tiab] OR "1-12 month"[tiab] OR "1-13 month"[tiab] OR "1-14 month"[tiab] OR "2-3 month"[tiab] OR "2-4 month"[tiab] OR "2-5 month"[tiab] OR "2-6 month"[tiab] OR "2-7 month"[tiab] OR "2-8 month"[tiab] OR "2-9 month"[tiab] OR "2-10 month"[tiab] OR "2-11 month"[tiab] OR "2-12 month"[tiab] OR "2-13 month"[tiab] OR "2-14 month"[tiab] OR "3-4 month"[tiab] OR "3-5 month"[tiab] OR "3-6 month"[tiab] OR "3-7 month"[tiab] OR "3-8 month"[tiab] OR "3-9 month"[tiab] OR "3-10 month"[tiab] OR "3-11 month"[tiab] OR "3-12 month"[tiab] OR "3-13 month"[tiab] OR "3-14 month"[tiab]</p> <p>8 "1-2 months"[tiab] OR "1-3 months"[tiab] OR "1-4 months"[tiab] OR "1-5 months"[tiab] OR "1-6 months"[tiab] OR "1-7 months"[tiab] OR "1-8 months"[tiab] OR "1-9 months"[tiab] OR "1-10 months"[tiab] OR "1-11 months"[tiab] OR "1-12 months"[tiab] OR "1-13 months"[tiab] OR "1-14 months"[tiab] OR "2-3 months"[tiab] OR "2-4 months"[tiab] OR "2-5 months"[tiab] OR "2-6 months"[tiab] OR "2-7 months"[tiab] OR "2-8 months"[tiab] OR "2-9 months"[tiab] OR "2-10 months"[tiab] OR "2-11 months"[tiab] OR "2-12 months"[tiab] OR "2-13 months"[tiab] OR "2-14 months"[tiab] OR "3-4 months"[tiab] OR "3-5 months"[tiab] OR "3-6 months"[tiab] OR "3-7 months"[tiab] OR "3-8 months"[tiab] OR "3-9 months"[tiab] OR "3-10 months"[tiab] OR "3-11 months"[tiab] OR "3-12 months"[tiab] OR "3-13 months"[tiab] OR "3-14 months"[tiab]</p> <p>9 "4-5 month"[tiab] OR "4-6 month"[tiab] OR "4-7 month"[tiab] OR "4-8 month"[tiab] OR "4-9 month"[tiab] OR "4-10 month"[tiab] OR "4-11 month"[tiab] OR "4-12 month"[tiab] OR "4-13 month"[tiab] OR "4-14 month"[tiab] OR "5-6 month"[tiab] OR "5-7 month"[tiab] OR "5-8 month"[tiab] OR "5-9 month"[tiab] OR "5-10 month"[tiab] OR "5-11 month"[tiab] OR "5-12 month"[tiab] OR "5-13 month"[tiab] OR "5-14 month"[tiab] OR "6-7 month"[tiab] OR "6-8 month"[tiab] OR "6-9 month"[tiab] OR "6-10 month"[tiab] OR "6-11 month"[tiab] OR "6-12 month"[tiab] OR "6-13 month"[tiab] OR "6-14 month"[tiab] OR "7-8 month"[tiab] OR "7-9 month"[tiab] OR "7-10 month"[tiab] OR "7-11 month"[tiab] OR "7-12 month"[tiab] OR "7-13 month"[tiab] OR "7-14 month"[tiab] OR "8-9 month"[tiab] OR "8-10 month"[tiab] OR "8-11 month"[tiab] OR "8-12 month"[tiab] OR "8-13 month"[tiab] OR "8-14 month"[tiab] OR "4-5 months"[tiab] OR "4-6 months"[tiab] OR "4-7 months"[tiab] OR "4-8 months"[tiab] OR "4-9 months"[tiab] OR "4-10 months"[tiab] OR "4-11 months"[tiab] OR "4-12 months"[tiab] OR "4-13 months"[tiab] OR "4-14 months"[tiab] OR "5-6 months"[tiab] OR "5-7 months"[tiab] OR "5-8 months"[tiab] OR "5-9 months"[tiab] OR "5-10 months"[tiab] OR "5-11 months"[tiab] OR "5-12 months"[tiab] OR "5-13 months"[tiab] OR "5-14 months"[tiab] OR "6-7 months"[tiab] OR "6-8 months"[tiab] OR "6-9 months"[tiab] OR "6-10 months"[tiab] OR "6-11 months"[tiab] OR "6-12 months"[tiab] OR "6-13 months"[tiab] OR "6-14 months"[tiab] OR "7-8 months"[tiab] OR "7-9 months"[tiab] OR "7-10 months"[tiab] OR "7-11 months"[tiab] OR "7-12 months"[tiab] OR "7-13 months"[tiab] OR "7-14 months"[tiab] OR "8-9 months"[tiab] OR "8-10 months"[tiab] OR "8-11 months"[tiab] OR "8-12 months"[tiab] OR "8-13 months"[tiab] OR "8-14 months"[tiab]</p> <p>10 "at birth"[tiab] OR newborn*[tiab] OR "one month"[tiab] OR "two month"[tiab] OR "three month"[tiab] OR "four month"[tiab] OR "five month"[tiab] OR "six month"[tiab] OR "seven month"[tiab] OR "eight month"[tiab] OR "two months"[tiab] OR "three months"[tiab] OR "four months"[tiab] OR "five months"[tiab] OR "six months"[tiab] OR "seven months"[tiab] OR "eight months"[tiab] OR "nine months"[tiab] 401.784</p> <p>11 "first month"[tiab] OR "second month"[tiab] OR "third month"[tiab] OR "fourth month"[tiab] OR "fifth month"[tiab] OR "sixth month"[tiab] OR "seventh month"[tiab] OR "eighth month"[tiab] OR "first two months"[tiab] OR "first three months"[tiab] OR "first four months"[tiab] OR "first five months"[tiab] OR "first six months"[tiab] OR "first seven months"[tiab] OR "first eight months"[tiab] OR "first nine months"[tiab] OR "first 2 months"[tiab] OR "first 3 months"[tiab] OR "first 4 months"[tiab] OR "first 5 months"[tiab] OR "first 6 months"[tiab] OR "first 7 months"[tiab]</p> |

OR "first 8 months"[tiab] OR "first 9 months"[tiab] 40.451

12 "4.5 months"[tiab] OR ("first dose"[tiab] AND before[tiab] AND "9 months"[tiab]) 3.073

13 "early vaccination"[tiab] OR "early immunization"[tiab] OR "early immunisation"[tiab] OR "early mv"[tiab] OR "early schedule"[tiab] OR "give earlier"[tiab] OR "early mv"[tiab] OR "primary mv"[tiab] OR "given earlier"[tiab] OR "early infancy"[tiab] 5.842

14 #4 AND (#5 OR #6 OR #7 OR #8 OR #9 OR #10 OR #11 OR #12 OR #13) 829

15 (immunogenicity[tiab] OR efficacy[tiab] OR effectiveness[tiab]) OR (immunogenicity[ot] OR efficacy[ot] OR effectiveness[ot]) OR ("optimal age"[ti] OR "optimum age"[ti]) 820505

16 "measles cases"[tiab] OR ("measles"[mh] AND "incidence"[mh]) OR "measles/mortality"[mh] OR ("infant mortality"[mh] OR "mortality"[mh]) AND "measles vaccine"[mh]) OR (measles[tiab] AND(death\*[tiab] OR mortality[tiab])) 1.093.324

17 "antibodies, viral/blood"[mh] OR "antibodies, neutralizing/blood"[mh] OR "immunoglobulin g/blood"[mh] OR "enzyme-linked immunosorbent assay"[mh] OR "hemagglutination inhibition tests"[mh] OR "neutralization tests"[mh] 226.931

18 "plaque reduction neutralization test"[tiab] OR prnt[tiab] OR "enzyme-linked immunosorbent assay"[tiab] OR elisa[tiab] OR "hemagglutination inhibition assay"[tiab] OR "hi assay"[tiab] OR "complement fixation assay"[tiab] OR "cf assay"[tiab] OR avidity[tiab] 198.862

19 "measles virus/immunology"[mh] OR "measles/immunology"[mh] OR "measles vaccine/immunology"[mh] OR "measles vaccine/adverse effects"[mj] OR "antibody formation"[mh] OR "antibodies, viral/immunology"[mh] OR "antibody affinity"[mh] OR "immunity, active"[mh] OR "t-lymphocytes/immunology"[mh] OR "immunity, cellular"[mh] OR "lymphocyte activation"[mh] OR "cytopathogenic effect, viral"[mh] OR "stimulation index"[tiab] OR "t-cell proliferation"[tiab] 398.241

20 "antibody response"[tiab] OR "antibody responses"[tiab] OR "antibody titer"[tiab] OR "antibody titers"[tiab] OR "antibody titre"[tiab] OR "antibody titres"[tiab] OR "antibody level"[tiab] OR "antibody levels"[tiab] OR "immune response"[tiab] OR "immune responses"[tiab] OR "t-cell response"[tiab] OR "t-cell responses"[tiab] OR "cell-mediated immunity"[tiab] OR "humoral immunity"[tiab] OR "measles igg"[tiab] OR seroconversion[tiab] OR "response to vaccination"[tiab] OR (response[tiab] AND "measles vaccination"[tiab]) 324.861

21 "improve survival"[tiab] OR "improves survival"[tiab] OR "mortality reduction"[tiab] OR "child mortality"[tiab] OR ((prevention[tiab] OR risk\*[tiab]) AND measles[tiab]) 59.283

22 (reactogenicity[tiab] OR safety[tiab] OR "adverse events"[tiab] OR "adverse effects"[tiab] OR "side effects"[tiab] OR fever[tiab] OR "local reaction"[tiab] OR "local reactions"[tiab] OR convulsion[tiab] OR convulsions[tiab] OR purpura[tiab] OR rash[tiab]) OR (reactogenicity[ot] OR safety[ot] OR "adverse events"[ot] OR "adverse effects"[ot] OR "side effects"[ot] OR fever[ot] OR "local reaction"[ot] OR "local reactions"[ot] OR convulsion[ot] OR convulsions[ot] OR purpura[ot] OR rash[ot]) 988.546

23 "aseptic meningitis"[tiab] OR seizures[tiab] OR encephalopathy[tiab] OR anaphylaxis[tiab] OR hypersensitivity[tiab] OR "allergic reaction"[tiab] OR "allergic reactions"[tiab] OR "joint pain"[tiab] OR arthropathy[tiab] OR arthralgia[tiab] OR arthritis[tiab] OR cough[tiab] OR diarrhoea[tiab] OR diarrhea[tiab] 522.928

24 "measles vaccine/adverse effects"[mh] OR "measles-mumps-rubella vaccine/adverse effects"[mh] OR ("measles vaccine"[mh] AND ("adverse effects"[sh] OR "chemically induced"[sh]) OR complications[sh] OR toxicity[sh] OR poisoning[sh] OR drug effects[sh])) 2388

25 (adverse[tiab] AND (effect\*[tiab] OR event\*[tiab])) OR "side effect"[tiab] OR "side effects"[tiab] OR hypersensitiv\*[tiab] OR sensitiv\*[tiab] OR safe\*[tiab] OR pharmacovigilance[tiab] 2.479.698

26 #14 AND (#15 OR #16 OR #17 OR #18 OR #19 OR #20 OR #21 OR #22 OR #23 OR #24 OR #25) 659

27 english[la] OR dutch[la] OR german[la] OR french[la] OR spanish[la] 26.515.482

28 #26 AND #27 622

29 #28 AND 2015:2019[dp] 70

30 #29 AND "2015/05/01 15.00"[mhda]:"2019/01/14 15.00"[mhda]

**GLOBAL Health, EMBASE**

1. ((measles:ti OR mmr\*:ti OR schwarz:ti OR moraten:ti OR edmonston:ti OR 'edmonston zagreb':ti OR 'leningrad 16':ti OR 'shanghai 191':ti OR 'cam 70':ti OR 'aik c':ti OR td97:ti) AND (vaccine\*:ti OR vaccination\*:ti OR immunization\*:ti OR immunisation\*:ti)) OR 'mr vaccine\*:ti OR mmrv:ti

2. 'measles vaccine'/mj OR 'measles mumps rubella vaccine'/mj OR 'measles rubella vaccine'/mj OR 'measles mumps vaccine'/mj OR ('measles vaccine'/de AND ('vaccination'/mj OR 'immunization'/mj))

3. ('measles'/mj OR 'measles virus'/mj) AND ('vaccination'/mj OR 'immunization'/mj)

4. #1 OR #2 OR #3

5. 'before 9 months':ti,ab OR ('less than' NEAR/4 '9 months'):ti,ab OR (earlier NEAR/4 '9 months'):ti,ab OR 'under 9 months':ti,ab OR 'below 9 months':ti,ab OR ('younger than' NEAR/4 '9 months'):ti,ab

6. '0 month\*':ti,ab OR '1 month\*':ti,ab OR '2 month\*':ti,ab OR '3 month\*':ti,ab OR '4 month\*':ti,ab OR '5 month\*':ti,ab OR '6 month\*':ti,ab OR '7 month\*':ti,ab OR '8 month\*':ti,ab OR '9 month\*':ti,ab OR '1-2 month\*':ti,ab OR '1-3 month\*':ti,ab OR '1-4 month\*':ti,ab OR '1-5 month\*':ti,ab OR '1-6 month\*':ti,ab OR '1-7 month\*':ti,ab OR '1-8 month\*':ti,ab OR '1-9 month\*':ti,ab OR '2-3 month\*':ti,ab OR '2-4 month\*':ti,ab OR '2-5 month\*':ti,ab OR '2-6

month\*:ti,ab OR '2-7 month\*:ti,ab OR '2-8 month\*:ti,ab OR '2-9 month\*:ti,ab

7. '3-4 month\*:ti,ab OR '3-5 month\*:ti,ab OR '3-6 month\*:ti,ab OR '3-7 month\*:ti,ab OR '3-8 month\*:ti,ab OR '3-9 month\*:ti,ab OR '4-5 month\*:ti,ab OR '4-6 month\*:ti,ab OR '4-7 month\*:ti,ab OR '4-8 month\*:ti,ab OR '4-9 month\*:ti,ab OR '5-6 month\*:ti,ab OR '5-7 month\*:ti,ab OR '5-8 month\*:ti,ab OR '5-9 month\*:ti,ab OR '6-7 month\*:ti,ab OR '6-8 month\*:ti,ab OR '6-9 month\*:ti,ab OR '7-8 month\*:ti,ab OR '7-9 month\*:ti,ab OR '8-9 month\*:ti,ab

8. 'at birth':ti,ab OR newborn\*:ti,ab OR (one NEAR/4 month\*):ti,ab OR (two NEAR/4 month\*):ti,ab OR (three NEAR/4 month\*):ti,ab OR (four NEAR/4 month\*):ti,ab OR (five NEAR/4 month\*):ti,ab OR (six NEAR/4 month\*):ti,ab OR (seven NEAR/4 month\*):ti,ab OR (eight NEAR/4 month\*):ti,ab OR (nine NEAR/4 month\*):ti,ab

9. 'first month\*:ti,ab OR 'second month\*:ti,ab OR 'third month\*:ti,ab OR 'fourth month\*:ti,ab OR 'fifth month\*:ti,ab OR 'first two month\*:ti,ab OR 'first three month\*:ti,ab OR 'first four month\*:ti,ab OR 'first five month\*:ti,ab OR 'first six month\*:ti,ab OR 'first seven month\*:ti,ab OR 'first eight month\*:ti,ab OR 'first nine month\*:ti,ab OR 'first 2 month\*:ti,ab OR 'first 3 month\*:ti,ab OR 'first 4 month\*:ti,ab OR 'first 5 month\*:ti,ab OR 'first 6 month\*:ti,ab OR 'first 7 month\*:ti,ab OR 'first 8 month\*:ti,ab OR 'first 9 month\*:ti,ab

10. (weeks NEAR/4 age):ti,ab

11. '4.5 months':ti,ab OR ('first dose':ti,ab AND (before NEAR/9 months):ti,ab)

12. (early NEAR/3 vaccination):ti,ab OR (early NEAR/3 immunization):ti,ab OR (early NEAR/3 immunisation):ti,ab OR (early NEAR/3 mv):ti,ab OR (early NEAR/3 schedule):ti,ab OR 'give earlier':ti,ab OR 'early mv':ti,ab OR 'primary mv':ti,ab OR 'given earlier':ti,ab OR 'early infancy':ti,ab

13. #4 AND (#5 OR #6 OR #7 OR #8 OR #9 OR #10 OR #11 OR #12)

14. immunogenicity:ti,ab,de OR efficacy:ti,ab,de OR effectiveness:ti,ab,de OR effectivity:ti,ab,de OR immunological impact':ti,ab,de OR 'immunogenicity'/de OR 'vaccine immunogenicity'/de OR 'drug efficacy'/de OR 'optimal age':ti OR 'optimum age':ti

15. 'measles cases':ti,ab OR ('measles'/de AND 'incidence'/de) OR ('infant mortality'/de OR 'mortality'/de OR 'death'/de AND 'measles vaccine'/de) OR (measles NEAR/4 (death\* OR mortality OR incidence)):ti,ab

16. 'virus antibody'/de OR 'neutralizing antibody'/de OR 'immunoglobulin g'/de OR 'enzyme-linked immunosorbent assay'/de OR 'enzyme-linked immunosorbent assay'/de OR 'hemagglutination inhibition test'/de OR 'virus neutralization'/de OR 'serodiagnosis'/de

17. 'plaque reduction neutralization test\*':ti,ab OR prnt:ti,ab OR 'enzyme-linked immunosorbent assay':ti,ab OR 'enzyme-linked immunosorbent assay':ti,ab OR 'hemagglutination inhibition assay':ti,ab OR 'hi assay':ti,ab OR 'complement fixation assay':ti,ab OR 'cf assay':ti,ab OR avidity:ti,ab

18. ('measles vaccine'/de AND 'drug administration'/lnk) OR 'antibody production' OR 'antibody affinity'/de OR 'cellular immunity'/de OR 'lymphocyte activation'/de OR 'cytopathogenic effect'/de OR ('stimulation index':ti,ab AND 't-cell proliferation':ti,ab)

19. 'antibody response\*':ti,ab OR 'antibody titer\*':ti,ab OR 'antibody titre\*':ti,ab OR 'antibody level\*':ti,ab OR 'immune response\*':ti,ab OR 't-cell response\*':ti,ab OR 'cell-mediated immunity':ti,ab OR (humoral NEAR/3 immunity):ti,ab OR 'measles igg':ti,ab OR seroconversion:ti,ab OR 'response to vaccination':ti,ab OR (response NEAR/3 'measles vaccination'):ti,ab

20. (improve NEAR/3 survival):ti,ab OR (improves NEAR/3 survival):ti,ab OR 'mortality reduction':ti,ab OR 'child mortality':ti,ab OR (prevention NEAR/3 measles):ti,ab OR (risk NEAR/3 measles):ti,ab

21. reactogenicity:ti,ab,de OR safety:ti,ab,de OR 'adverse events':ti,ab,de OR 'adverse effects':ti,ab,de OR 'side effects':ti,ab,de OR fever:ti,ab,de OR 'local reaction\*':ti,ab,de OR convulsion\*:ti,ab,de OR purpura:ti,ab,de OR rash:ti,ab,de

22. 'aseptic meningitis':ti,ab OR seizures:ti,ab OR encephalopathy:ti,ab OR anaphylaxis:ti,ab OR hypersensitivity:ti,ab OR 'allergic reaction\*':ti,ab OR 'joint pain':ti,ab OR arthropathy:ti,ab OR arthralgia:ti,ab OR arthritis:ti,ab OR cough:ti,ab OR diarrhoea:ti,ab OR diarrhea:ti,ab

23. 'measles vaccine'/de OR 'measles mumps rubella vaccine'/de OR 'measles rubella vaccine'/de OR 'measles mumps vaccine'/de AND ('adverse drug reaction'/lnk OR 'side effect'/lnk)

24. 'measles vaccine'/de OR 'measles mumps rubella vaccine'/de OR 'measles rubella vaccine'/de OR 'measles mumps vaccine'/de AND ('adverse events':de OR 'side effects':de OR 'chemically induced':de OR complications:de OR contraindications:de OR toxicity:de OR poisoning:de OR 'drug effects':de)

25. (adverse:ti,ab AND (effect\*:ti,ab OR event\*:ti,ab)) OR 'side effect\*':ti,ab OR hypersensitiv\*:ti,ab OR sensitiv\*:ti,ab OR safe\*:ti,ab OR pharmacovigil\*:ti,ab

26. #13 AND (#14 OR #15 OR #16 OR #17 OR #18 OR #19 OR #20 OR #21 OR #22 OR #23 OR #24 OR #25)

27. english:la OR dutch:la OR german:la OR french:la OR spanish:la

28. #26 AND #27

29. [animals]/lim NOT [humans]/lim

30. macaque\*:ti OR primate\*:ti OR rodent\*:ti OR mice:ti OR mouse:ti OR murine:ti OR rat:ti OR rats:ti

31. 'case report':it OR news:it OR letter:it OR note:it OR comment:it OR editorial:it OR erratum:it

32. #28 NOT (#29 OR #30 OR #31)

33. [2015-2019]/py AND [01-05-2015]/sd

- 
34. #32 AND #33
1. (TITLE(measles\* OR mmr\* OR schwarz OR moraten OR edmonston OR edmonston-zagreb OR (Leningrad-16) OR (Shanghai-191) OR (CAM-70) OR (AIK-C) OR TD97) AND TITLE(vaccine\* OR vaccination\* OR immunization\* OR immunisation\*)) OR TITLE((mr-vaccine\*) OR mmrv)
  2. (KEY(measles\* OR mmr\* OR schwarz OR moraten OR edmonston OR edmonston-zagreb OR (Leningrad-16) OR (Shanghai-191) OR (CAM-70) OR (AIK-C) OR TD97) AND KEY(vaccine\* OR vaccination\* OR immunization\* OR immunisation\*)) OR KEY((mr-vaccine\*) OR mmrv)
  3. #1 OR #2
  4. TITLE-ABS-KEY((before-9-months) OR ((less-than) W/4 (9-months)) OR (earlier W/4 (9-months)) OR (under-9-months) OR (below-9-months) OR ((younger-than) W/4 (9-months)))
  5. TITLE-ABS-KEY((0-month\*) OR (1-month\*) OR (2-month\*) OR (3-month\*) OR (4-month\*) OR (5-month\*) OR (6-month\*) OR (7-month\*) OR (8-month\*) OR (9-month\*) OR (1-2-month\*) OR (1-3-month\*) OR (1-4-month\*) OR (1-5-month\*) OR (1-6-month\*) OR (1-7-month\*) OR (1-8-month\*) OR (1-9-month\*) OR (2-3-month\*) OR (2-4-month\*) OR (2-5-month\*) OR (2-6-month\*) OR (2-7-month\*) OR (2-8-month\*) OR (2-9-month\*))
  6. TITLE-ABS-KEY ((3-4-month\*) OR (3-5-month\*) OR (3-6 month\*) OR (3-7 month\*) OR (3-8 month\*) OR (3-9 month\*) OR (4-5-month\*) OR (4-6-month\*) OR (4-7-month\*) OR (4-8-month\*) OR (4-9-month\*) OR (5-6-month\*) OR (5-7-month\*) OR (5-8-month\*) OR (5-9-month\*) OR (6-7-month\*) OR (6-8-month\*) OR (6-9-month\*) OR (7-8-month\*) OR (7-9-month\*) OR (8-9-month\*))
  7. TITLE-ABS-KEY((at-birth) OR newborn\* OR (one W/4 month\*) OR (two W/4 month\*) OR (three W/4 month\*) OR (four W/4 month\*) OR (five W/4 month\*) OR (six W/4 month\*) OR (seven W/4 month\*) OR (eight W/4 month\*))
  8. TITLE-ABS-KEY((first-month\*) OR (second-month\*) OR (third-month\*) OR (fourth-month\*) OR (fifth-month\*) OR (sixth-month\*) OR (seventh-month\*) OR (eighth-month\*) OR (first-two-month\*) OR (first-three month\*) OR (first-four-month\*) OR (first- five month\*) OR (first-six month\*) OR (first-seven month\*) OR (first-eight month\*) OR (first-nine month\*) OR (first-2-month\*) OR (first-3-month\*) OR (first-4-month\*) OR (first-5-month\*) OR (first-6-month\*) OR (first-7-month\*) OR (first-8-month\*) OR (first-9-month\*))
  9. TITLE-ABS-KEY(weeks W/4 age)
  10. TITLE-ABS-KEY(4.5-months) OR (TITLE-ABS-KEY(first-dose) AND TITLE-ABS-KEY(before W/9 months))
  11. TITLE-ABS-KEY((early W/3 vaccination) OR (early W/3 immunization) OR (early W/3 immunisation) OR (early W/3 mv) OR (early W/3 schedule) OR (give-earlier) OR (early-mv) OR (primary-mv) OR (given-earlier) OR (early-infancy))
  12. #3 AND (#4 OR #5 OR #6 OR #7 OR #8 OR #9 OR #10 OR #11)
  13. TITLE-ABS-KEY(immunogenic\* OR efficacy OR effectiveness OR effectivity OR (immunological-impact) OR immunogenicity) OR TITLE((optimal-age) OR (optimum-age))
  14. TITLE-ABS-KEY((measles-cases) OR (measles AND incidence) OR ((mortality OR death) AND (measles-vaccin\*))) OR TITLE-ABS-KEY(measles W/4 (death\* OR mortality OR incidence))
  15. TITLE-ABS-KEY((plaque-reduction-neutralization-test\*) OR prnt OR (enzyme-linked-immunosorbent-assay) OR (enzyme-linked-immunospot-assay) OR elisa OR (hemagglutination-inhibition assay) OR (hi-assay) OR (complement-fixation-assay) OR (cf-assay) OR avidity OR (virus-anitibod\*) OR (neutralizing-antibod\*) OR (immunogloublin-g) OR (virus-neutralization) OR serodiagnosis)
  16. (KEY(measles vaccine) AND KEY(drug-administration)) OR KEY((antibody-production) OR (antibody-affinity) OR (cellular-immunity) OR (lymphocyte-activation) OR (cytopathogenic-effect) OR ((stimulation-index) AND (t-cell-proliferation)))
  17. TITLE-ABS-KEY((antibody-response\*) OR (antibody-titer\*) OR (antibody-titre\*) OR (antibody-level\*) OR (immune-response\*) OR (t-cell-response\*) OR (cell-mediated-immunity) OR (humoral W/3 immunity) OR (measles-igg) OR seroconversion OR (response-to-vaccination) OR (response W/3 (measles-vaccination)))
  18. TITLE-ABS-KEY((improve W/3 survival) OR (improves W/3 survival) OR (mortality-reduction) OR (child-mortality) OR (prevention W/3 measles) OR (risk W/3 measles))
  19. TITLE-ABS-KEY(reactogenicity OR safety OR (adverse-events) OR (adverse-effects) OR (side-effects) OR fever OR (local-reaction\*) OR convulsion\* OR purpura OR rash)
  20. TITLE-ABS-KEY((aseptic-meningitis) OR seizures OR encephalopath\* OR anaphylaxis OR hypersensitivity OR (allergic-reaction\*) OR (joint-pain) OR arthropathy OR arthralgia OR arthritis OR cough OR diarrhoea OR diarrhea)
  21. KEY((measles-vaccine) OR (measles-mumps-rubella-vaccine) OR (measles-rubella vaccine) OR (measles-mumps-vaccine) ) AND KEY((adverse-drug-reaction\*) OR (adverse-effect\*) OR (adverse-event\*) OR (side-effect\*) OR (chemically-induced) OR complications OR contraindications OR toxicity OR poisoning OR (drug-effects))
  22. TITLE-ABS-KEY(adverse W/5 (effect\* OR event\*)) OR TITLE-ABS-KEY((side-effect\*) OR hypersensitiv\* OR sensitiv\* OR safe\* OR pharmacovigil\*)
  23. #12 AND (#13 OR #14 OR #15 OR #16 OR #17 OR #18 OR #19 OR #20 OR #21 OR #22)
  24. LANGUAGE(english OR dutch OR german OR french OR spanish)
  25. #23 AND #24
  26. KEY(animal\*) NOT KEY(human\*)
  18. TITLE(macaque\* OR primate\* OR rodent\* OR mice OR mouse OR murine OR rat OR rats)
  19. DOCTYPE(ed) OR DOCTYPE(er) OR DOCTYPE(no) OR DOCTYPE(le)
  20. #25 AND NOT (#26 OR #27 OR #28)
-

|                 |     |                                                                                                                                                                                                                                                                                                                                                                                                                                                                                                                                     |
|-----------------|-----|-------------------------------------------------------------------------------------------------------------------------------------------------------------------------------------------------------------------------------------------------------------------------------------------------------------------------------------------------------------------------------------------------------------------------------------------------------------------------------------------------------------------------------------|
|                 | 21. | (PUBYEAR AFT 2014 OR PUBYEAR IS 2014) AND ORIG-LOAD-DATE AFT 20150501                                                                                                                                                                                                                                                                                                                                                                                                                                                               |
|                 | 22. | #20 AND #21                                                                                                                                                                                                                                                                                                                                                                                                                                                                                                                         |
| <b>Proquest</b> | 1.  | (TI(measles* OR mmr* OR schwarz OR moraten OR edmonston OR (edmonston-zagreb) OR (Leningrad-16) OR (Shanghai-191) OR (CAM-70) OR (AIK-C) OR TD97) AND TI(vaccine* OR vaccination* OR immunization* OR immunisation*)) OR TI((mr-vaccine*) OR mmrv)                                                                                                                                                                                                                                                                                  |
|                 | 2.  | (SU(measles* OR mmr* OR schwarz OR moraten OR edmonston OR edmonston-zagreb) OR (Leningrad-16) OR (Shanghai-191) OR (CAM-70) OR (AIK-C) OR TD97) AND SU(vaccine* OR vaccination* OR immunization* OR immunisation*)) OR SU((mr-vaccine*) OR mmrv)                                                                                                                                                                                                                                                                                   |
|                 | 3.  | S1 OR S2                                                                                                                                                                                                                                                                                                                                                                                                                                                                                                                            |
|                 | 4.  | TI,AB((before-9-months) OR ((less-than) W/4 (9-months)) OR (earlier W/4 (9-months)) OR (under-9-months) OR (below-9-months) OR ((younger-than) W/4 (9-months)))                                                                                                                                                                                                                                                                                                                                                                     |
|                 | 5.  | TI,AB((0-month*) OR (1-month*) OR (2-month*) OR (3-month*) OR (4-month*) OR (5-month*) OR (1-2-month*) OR (1-3-month*) OR (1-4-month*) OR (1-5-month*) OR (1-6-month*) OR (1-7-month*) OR (1-8-month*) OR (1-9-month*) OR (2-3-month*) OR (2-4-month*) OR (2-5-month*) OR (2-6-month*) OR (2-7-month*) OR (2-8-month*) OR (2-9-month*))                                                                                                                                                                                             |
|                 | 6.  | TI,AB((3-4-month*) OR (3-5-month*) OR (3-6 month*) OR (3-7 month*) OR (3-8 month*) OR (3-9 month*) OR (4-5-month*) OR (4-6-month*) OR (4-7-month*) OR (4-8-month*) OR (4-9-month*) OR (5-6-month*) OR (5-7-month*) OR (5-8-month*) OR (5-9-month*) OR (6-7-month*) OR (6-8-month*) OR (6-9-month*) OR (7-8-month*) OR (7-9-month*) OR (8-9-month*))                                                                                                                                                                                 |
|                 | 7.  | TI,AB((at-birth) OR newborn* OR (one W/4 month*) OR (two W/4 month*) OR (three W/4 month*) OR (four W/4 month*) OR (five W/4 month*) OR (six W/4 month*) OR (seven W/4 month*) OR (eight W/4 month*) OR (nine W/4 month*))                                                                                                                                                                                                                                                                                                          |
|                 | 8.  | TI,AB((first-month*) OR (second-month*) OR (third-month*) OR (fourth-month*) OR (fifth-month*) OR (sixth-month*) OR (seventh-month*) OR (eighth-month*) OR (nine-month*) OR (first-two-month*) OR (first-three month*) OR (first-four-month*) OR (first- five month*) OR (first-six month*) OR (first-seven month*) OR (first-eight month*) OR (first-nine month*) OR (first-2-month*) OR (first-3-month*) OR (first-4-month*) OR (first-5-month*) OR (first-6-month*) OR (first-7-month*) OR (first-8-month*) OR (first-9-month*)) |
|                 | 9.  | TI,AB(weeks W/4 age)                                                                                                                                                                                                                                                                                                                                                                                                                                                                                                                |
|                 | 10. | TI,AB(4.5-months) OR (TI,AB,SU(first-dose) AND TI,AB,SU(before W/9 months))                                                                                                                                                                                                                                                                                                                                                                                                                                                         |
|                 | 11. | TI,AB((early W/3 vaccination) OR (early W/3 immunization) OR (early W/3 immunisation) OR (early W/3 mv) OR (early W/3 schedule) OR (give-earlier) OR (early-mv) OR (primary-mv) OR (given-earlier) OR (early-infancy))                                                                                                                                                                                                                                                                                                              |
|                 | 12. | S3 AND (S4 OR S5 OR S6 OR S7 OR S8 OR S9 OR S10 OR S11)                                                                                                                                                                                                                                                                                                                                                                                                                                                                             |
|                 | 13. | TI,AB,SU(immunogenic* OR efficacy OR effectiveness OR effectivity OR (immunological-impact) OR immunogenicity) OR TI((optimal-age) OR (optimum-age))                                                                                                                                                                                                                                                                                                                                                                                |
|                 | 14. | TI,AB,SU((measles-cases) OR (measles AND incidence) OR ((mortality OR death) AND (measles-vaccin*)) OR TI,AB,SU(measles W/4 (death* OR mortality OR incidence))                                                                                                                                                                                                                                                                                                                                                                     |
|                 | 15. | TI,AB,SU((plaque-reduction-neutralization-test*) OR prnt OR (enzyme-linked-immunosorbent-assay) OR (enzyme-linked-immunospot-assay) OR elisa OR (hemagglutination-inhibition-assay) OR (hi-assay) OR (complement-fixation-assay) OR (cf-assay) OR avidity OR (virus-anitibod*) OR (neutralizing-antibod*) OR (immunoglobulin-g) OR (virus-neutralization) OR serodiagnosis)                                                                                                                                                         |
|                 | 16. | (SU(measles vaccine) AND SU(drug-administration)) OR SU((antibody-production) OR (antibody-affinity) OR (cellular-immunity) OR (lymphocyte-activation) OR (cytopathogenic-effect) OR ((stimulation-index) AND (t-cell-proliferation)))                                                                                                                                                                                                                                                                                              |
|                 | 17. | TI,AB,SU((antibody-response*) OR (antibody-titer*) OR (antibody-titre*) OR (antibody-level*) OR (immune-response*) OR (t-cell-response*) OR (cell-mediated-immunity) OR (humoral W/3 immunity) OR (measles-igg) OR seroconversion OR (response-to-vaccination) OR (response W/3 (measles-vaccination)))                                                                                                                                                                                                                             |
|                 | 18. | TI,AB,SU((improve W/3 survival) OR (improves W/3 survival) OR (mortality-reduction) OR (child-mortality) OR (prevention W/3 measles) OR (risk W/3 measles))                                                                                                                                                                                                                                                                                                                                                                         |
|                 | 19. | TI,AB,SU(reactogenicity OR safety OR (adverse-events) OR (adverse-effects) OR (side-effects) OR fever OR (local-reaction*) OR convulsion* OR purpura OR rash)                                                                                                                                                                                                                                                                                                                                                                       |
|                 | 20. | TI,AB,SU((aseptic-meningitis) OR seizures OR encephalopath* OR anaphylaxis OR hypersensitivity OR (allergic-reaction*) OR (joint-pain) OR arthropathy OR arthralgia OR arthritis OR cough OR diarrhoea OR diarrhea)                                                                                                                                                                                                                                                                                                                 |
|                 | 21. | SU((measles-vaccine) OR (measles-mumps-rubella-vaccine) OR (measles-rubella vaccine) OR (measles-mumps-vaccine)) AND SU((adverse-drug-reaction*) OR (adverse-effect*) OR (adverse-event*) OR (side-effect*) OR (chemically-induced) OR complications OR contraindications OR toxicity OR poisoning OR (drug-effects))                                                                                                                                                                                                               |
|                 | 22. | TI,AB,SU(adverse W/5 (effect* OR event*)) OR TI,AB,SU((side-effect*) OR hypersensitiv* OR sensitiv* OR safe* OR pharmacovigil*)                                                                                                                                                                                                                                                                                                                                                                                                     |
|                 | 23. | S12 AND (S13 OR S14 OR S15 OR S16 OR S17 OR S18 OR S19 OR S20 OR S21 OR S22)                                                                                                                                                                                                                                                                                                                                                                                                                                                        |
|                 | 24. | LA(english OR dutch OR german OR french OR spanish)                                                                                                                                                                                                                                                                                                                                                                                                                                                                                 |
|                 | 25. | S23 AND S24                                                                                                                                                                                                                                                                                                                                                                                                                                                                                                                         |
|                 | 26. | SU(animal*) NOT SU(human*)                                                                                                                                                                                                                                                                                                                                                                                                                                                                                                          |
|                 | 27. | TI(macaque* OR primate* OR rodent* OR mice OR mouse OR murine OR rat OR rats)                                                                                                                                                                                                                                                                                                                                                                                                                                                       |
|                 | 28. | DTYPE(editorial OR erratum OR NOTE OR news OR letter OR comment OR (case-report))                                                                                                                                                                                                                                                                                                                                                                                                                                                   |
|                 | 29. | S25 NOT (S26 OR S27 OR S28)                                                                                                                                                                                                                                                                                                                                                                                                                                                                                                         |
|                 | 30. | YR(2015-2019) AND PD(20150501-20190114)                                                                                                                                                                                                                                                                                                                                                                                                                                                                                             |

**WHO LIS**

Words or phrase: measles\$

AND

Words or phrase: vaccin\$ OR immunization\$ OR immunisation\$

---

**WHO IRIS**

Search: All of WHO IRIS

For: Measles

Current filters:

Title: measles AND vaccine

OR

Title: measles AND vaccines

OR

Title: measles AND immunization

OR

Title: measles AND immunisation

---



## Decision rules for data selection and extraction processes

Table 2: Decision rules for data selection and extraction processes

|                                                                                                                                                                                                                                                                                                                                                                                                                                                                                                                                                                                                                                                                                                                                                                                                                                                                                                                                                                                                                                                                                                                                                                                                                                                                                                                                                                                                                                                                                                                                                                                                                                                                                                                                                                                                                                                                                                                                                                                                                                                                                                                                                                                                                                                         |
|---------------------------------------------------------------------------------------------------------------------------------------------------------------------------------------------------------------------------------------------------------------------------------------------------------------------------------------------------------------------------------------------------------------------------------------------------------------------------------------------------------------------------------------------------------------------------------------------------------------------------------------------------------------------------------------------------------------------------------------------------------------------------------------------------------------------------------------------------------------------------------------------------------------------------------------------------------------------------------------------------------------------------------------------------------------------------------------------------------------------------------------------------------------------------------------------------------------------------------------------------------------------------------------------------------------------------------------------------------------------------------------------------------------------------------------------------------------------------------------------------------------------------------------------------------------------------------------------------------------------------------------------------------------------------------------------------------------------------------------------------------------------------------------------------------------------------------------------------------------------------------------------------------------------------------------------------------------------------------------------------------------------------------------------------------------------------------------------------------------------------------------------------------------------------------------------------------------------------------------------------------|
| <p><b>Eligibility criteria</b></p> <p><b>Types of studies</b></p> <ul style="list-style-type: none"><li>• Randomized control trials (RCTs), quasi-randomised control trials (qRCTs), outbreak investigations, cohort and case control studies regarding vaccination schedules for currently licensed measles containing vaccines (MCV).</li></ul> <p><b>Types of participants</b></p> <ul style="list-style-type: none"><li>• Infants &lt;9 months of age receiving their first dose of a MCV.</li></ul> <p><b>Types of intervention</b></p> <ul style="list-style-type: none"><li>• Any currently licensed MCV administered to infants &lt;9 months of age. A currently licensed MCV can be:<ul style="list-style-type: none"><li>- Monovalent vaccine: Schwarz, Moraten, Edmonston, Edmonston-Zagreb, Leningrad-16, Shanghai-191, CAM-70, AIK-C and TD97.</li><li>- Combination vaccine containing various combinations of the above measles strains with other viruses: measles and rubella (MR), measles, mumps and rubella (MMR), measles, mumps, rubella and varicella (MMRV).</li></ul></li></ul> <p><b>Minimum data requirements</b></p> <ul style="list-style-type: none"><li>• For inclusion in the review, all articles must report age at vaccination. Likewise, for studies on safety, an adverse event following immunization case definition is required, while immunogenicity studies should report the exact vaccine strain and/or potency used and type of laboratory test used.</li></ul> <p><b>Exclusion criteria</b></p> <ul style="list-style-type: none"><li>• Ecological studies, case reports, non-human primate studies, meeting abstracts, editorials, newspaper articles and other forms of popular media were excluded.</li><li>• High titre vaccines were excluded from the review, defined as vaccines with a TCID<sub>50</sub> of ≥4.7 or p.f.u. of ≥50,000 (F. Cutts, personal communication). Titres below this cut-off were assumed to be 'standard'. Study results derived from combining MCV with gamma globulin or obtained after intradermal (rather than subcutaneous) administration of MCV were also excluded from the review.</li><li>• Failure to meet any one of the above eligibility criteria.</li></ul> |
|---------------------------------------------------------------------------------------------------------------------------------------------------------------------------------------------------------------------------------------------------------------------------------------------------------------------------------------------------------------------------------------------------------------------------------------------------------------------------------------------------------------------------------------------------------------------------------------------------------------------------------------------------------------------------------------------------------------------------------------------------------------------------------------------------------------------------------------------------------------------------------------------------------------------------------------------------------------------------------------------------------------------------------------------------------------------------------------------------------------------------------------------------------------------------------------------------------------------------------------------------------------------------------------------------------------------------------------------------------------------------------------------------------------------------------------------------------------------------------------------------------------------------------------------------------------------------------------------------------------------------------------------------------------------------------------------------------------------------------------------------------------------------------------------------------------------------------------------------------------------------------------------------------------------------------------------------------------------------------------------------------------------------------------------------------------------------------------------------------------------------------------------------------------------------------------------------------------------------------------------------------|

## Definitions of seroconversion accepted for inclusion in the review

**Table 3: Definitions of seroconversion accepted for inclusion in the review**

| Author, year                     | Definitions accepted for seroconversion                                                                                                                                      | Type of sample | Type of test |
|----------------------------------|------------------------------------------------------------------------------------------------------------------------------------------------------------------------------|----------------|--------------|
| Abanamy et al., 1992             | Greater or equal than fourfold rise in titre                                                                                                                                 | Serum          | Other        |
| Anonymous, 1977                  | Greater or equal than fourfold rise                                                                                                                                          | Blood cells    | Other        |
| Anonymous, 1981                  | From seronegative to seropositive                                                                                                                                            | Fingerstick    | HIA          |
| Anonymous, 1982                  | Greater or equal than fourfold increase in titre or greater or equal 1:10                                                                                                    | Serum          | HIA          |
| Bolotovskii et al., 1994         | From negative to positive or a greater or equal than fourfold titre rise above expected decay                                                                                | Fingerstick    | HIA          |
| Carson et al., 1995              | PRNT: fourfold increase in measles antibody titre                                                                                                                            | Serum          | PRNT         |
| Cutts et al., 1994               | Fourfold rise in titre pre/(expected) post vaccination 6 weeks and 6 months post vaccination                                                                                 | Fingerstick    | PRNT         |
| Diaz-Ortega et al., 1986         | Fourfold increase or change from seronegative to seropositive                                                                                                                | Fingerstick    | HIA          |
| Ekunwe, 1985                     | Fourfold rise in antibody titre                                                                                                                                              | Fingerstick    | HIA          |
| Fernandez de Castro et al., 1986 | Greater or equal than fourfold increase pre/post vaccination                                                                                                                 | Serum          | HIA          |
| Gans et al., 2013                | Greater or equal than fourfold increase in GMT (1998 paper)                                                                                                                  | Serum          | PRNT         |
| He et al., 2014                  | Any positive antibody response in seronegative infants or $\geq 4$ titer increase                                                                                            | Serum          | ELISA        |
| Job et al., 1984                 | Seronegative to seropositive                                                                                                                                                 | Fingerstick    | HIA          |
| Johnson et al., 1994             | Seronegative to seropositive                                                                                                                                                 | Serum          | Other        |
| Katiyar et al., 1985             | Greater than fourfold rise in HAI titre                                                                                                                                      | Serum          | HIA          |
| Khanum et al., 1987              | Fourfold increase in HI                                                                                                                                                      | Heel prick     | HIA          |
| Mandara et al., 1985             | Fourfold rise in titre post-vaccination                                                                                                                                      | Serum          | HIA          |
| Markowitz et al., 1990           | Change from negative ( $< 40$ miu) pre-vaccination to positive post-vaccination or fourfold increase in level above calculated titre expected 8 or 18 weeks post-vaccination | Fingerstick    | PRNT         |
| Ndumbe et al., 1995              | Prevaccination $< 200$ mu/ml and postvaccination positive or greater or equal fourfold increase 6 weeks postvaccination                                                      | Serum          | ELISA        |
| Nkrumah et al., 1998             | Seronegative to seropositive, or greater or equal fourfold increase in titre given decay                                                                                     | Serum          | HIA          |
| Pabst et al., 1999               | Fourfold increase in titer, adjusted for decay of maternal antibodies                                                                                                        | Serum          | PRNT         |
| Pongrithsukda et al., 1991       | No detectable to detectable antibody                                                                                                                                         | Serum          | PRNT         |
| Rogers et al., 1991              | Fourfold increase                                                                                                                                                            | Blood cells    | ELISA        |
| Schatzmayr et al., 1982          | Proportion seroconverted in those negative before vaccination (HI $< 10$ )                                                                                                   | Serum          | HIA          |
| Semba et al., 1995               | Greater or equal than fourfold titre rise                                                                                                                                    | Serum          | PRNT         |
| Soula et al., 1991               | Lower antibody titer of 1/10 before vaccination and equal or higher post vaccination                                                                                         | Serum          | HIA          |
| Stewien et al., 1978             | Greater or equal than fourfold titre increase between pre and post vaccination sample                                                                                        | Serum          | HIA          |

## Definitions of seroconversion not accepted for inclusion in the review

**Table 4: Definitions of seroconversion not accepted for inclusion in the review**

| Author, year              | Definitions not accepted for seroconversion                                                                                                       | Type of sample    | Type of test |
|---------------------------|---------------------------------------------------------------------------------------------------------------------------------------------------|-------------------|--------------|
| Breman et al., 1975       | No definition given                                                                                                                               | Serum             | HIA          |
| Cutts et al., 1994        | Optical density ratio pre/post $\geq 1.47$                                                                                                        | Other             | ELISA        |
| Deivanayagam et al., 1990 | Conversion from negative to positive or $\geq$ twofold rise in titre                                                                              | Serum             | HIA          |
| Gendrel et al., 1988      | Greater or equal than twofold rise of dilutions                                                                                                   | Dried blood spots | HIA          |
| Halsey et al., 1985       | From negative to $\geq 1:10$<br>Fourfold rise at 2 weeks, twofold rise at 3 months or conc $\geq 200$ miu/ml post-vacc with $<200$ prevaccination | Dried blood spots | HIA          |
| Hussey et al., 1995       | Greater or equal than 200 mlu/ml                                                                                                                  | Serum             | PRNT         |
| Job et al., 1991          | No definition given                                                                                                                               | Dried blood spots | PRNT         |
| King et al., 1978         | No definition given                                                                                                                               | Dried blood spots | HIA          |
| Kumar et al., 1998        | Titer $\leq 10$ (NT)                                                                                                                              | Serum             | PRNT         |
| Kurubi et al., 2009       | No definition given                                                                                                                               | Serum             | ELISA        |
| Lhuillier et al., 1989    | No definition given                                                                                                                               | Serum             | HIA          |
| McGraw et al., 1986       | Titre $\geq 10$                                                                                                                                   | Dried blood spots | HIA          |
| Mirchamsy et al., 1991    | Fourfold increase in HI titre                                                                                                                     | Other             | HIA          |
| Ogunmekan et al., 1981    | No definition given                                                                                                                               | Other             | HIA          |
| Sabin et al., 1984        | In Reference 1 (no full text available)                                                                                                           | Red blood cells   | PRNT         |
| Sakatoku et al., 1994     | Seropositive/ total samples                                                                                                                       | Serum             | HIA          |
| Simasathien et al., 1997  | Positive 9 month NT and $\geq 6$ month sample                                                                                                     | Serum             | PRNT         |
| Vidyashankar et al., 2002 | No definition given                                                                                                                               | Serum             | ELISA        |
| Whittle et al., 1988      | No definition given                                                                                                                               | Other             | PRNT         |
| Wilkins et al., 1979      | No definition given                                                                                                                               | Serum             | HIA          |
| Youwang et al., 2001      | Negative to positive or $\geq$ fourfold rise following re-immunisation                                                                            | Dried blood spots | ELISA        |

## Characteristics of studies included in the review by outcome

Table 5: Characteristics of studies included in the review by outcome

| Author, year             | Country                            | MCV1 age (months)                  | Vaccine Strain                                 | Immunogenicity |     |          |         | Duration of immunity | Vaccine effectiveness | Safety |
|--------------------------|------------------------------------|------------------------------------|------------------------------------------------|----------------|-----|----------|---------|----------------------|-----------------------|--------|
|                          |                                    |                                    |                                                | SC             | GMT | Cellular | Avidity |                      |                       |        |
| Abanamy et al., 1992     | Saudi Arabia                       | 6, 9                               | Schwarz, Edmonston-Zagreb                      | Yes            | -   | -        | -       | -                    | -                     | -      |
| Anonymous, 1977          | Kenya                              | 4,5,6,7,8,11                       | Schwarz                                        | Yes            | -   | -        | -       | -                    | -                     | -      |
| Anonymous, 1981          | Tanzania                           | 4-5, 6-7, 8-9, 10-11, 12-13, 14-15 | Schwarz                                        | Yes            | -   | -        | -       | -                    | -                     | -      |
| Anonymous, 1982          | Brazil, Chile, Costa Rica, Ecuador | 6-12                               | Moraten                                        | Yes            | -   | -        | -       | -                    | -                     | -      |
| Berry et al., 1992       | Peru                               | 5-6, 8-9                           | Schwarz, Edmonston-Zagreb                      | -              | -   | -        | -       | -                    | -                     | Yes    |
| Bolotovskii et al., 1994 | Uzbekistan                         | 6, 9                               | AIK-C, Edmonston-Zagreb, Leningrad 16, Schwarz | Yes            | -   | -        | -       | -                    | -                     | Yes    |
| Carson et al., 1975      | Canada                             | 6-8.5                              | Connaught                                      | Yes            | -   | -        | -       | -                    | -                     | -      |
| Cutts et al., 1994       | DRC                                | <5, 5, 5-6, 6, 6-7, 7-8, >9        | Edmonston-Zagreb                               | Yes            | Yes | -        | -       | -                    | -                     | -      |
| Diaz-Ortega et al., 1986 | Mexico                             | 8,9-10,11-12,13-14,15-16,17-18     | Schwarz                                        | Yes            | -   | -        | -       | -                    | -                     | -      |
| Dick et al., 1975        | South Africa                       | 6,7,8,9,10,11, 12                  | Moraten                                        | -              | -   | -        | -       | -                    | -                     | Yes    |
| Do et al., 2017          | Guinea Bissau                      | 4.5, 9                             | Edmonston-Zagreb                               | -              | -   | -        | -       | -                    | -                     | Yes    |

|                                  |                             |                           |                           |     |     |     |   |     |     |     |
|----------------------------------|-----------------------------|---------------------------|---------------------------|-----|-----|-----|---|-----|-----|-----|
| Ekunwe, 1985                     | Nigeria                     | 6,7,8,9-12,13-19,20-26    | Edmonston                 | Yes | -   | -   | - | -   | -   | -   |
| Fernandez de Castro et al., 1986 | Mexico                      | 6-9                       | Edmonston-Zagreb, Schwarz | Yes | -   | -   | - | -   | -   | Yes |
| Fisker et al, 2018               | Burkina Faso, Guinea Bissau | 4-7, 9                    | Edmonston-Zagreb          | -   | -   | -   | - | -   | -   | Yes |
| Gans et al., 1998                | USA                         | 6,9,12                    | Moraten                   | -   | -   | Yes | - | -   | -   | -   |
| Gans et al., 1999                | USA                         | 6,9,12                    | Moraten                   | -   | -   | Yes | - | -   | -   | -   |
| Gans et al., 2001                | USA                         | 6,9,12                    | Moraten                   | -   | Yes | Yes | - | -   | -   | -   |
| Garly et al., 2001               | Guinea-Bissau               | 6,9                       | Edmonston-Zagreb, Schwarz | -   | Yes | -   | - | -   | -   | -   |
| He et al., 2014                  | China                       | 8,12                      | Hu-191                    | Yes | -   | -   | - | Yes | -   | Yes |
| Helfand et al., 2008             | Malawi                      | 6,9                       | Edmonston-Zagreb          | -   | -   | -   | - | -   | -   | Yes |
| Hull et al., 1983 (61)           | Gambia                      | <6, 6-8, 9-11, 12-14, >15 | Moraten                   | -   | -   | -   | - | -   | Yes | -   |
| Job et al., 1984                 | India                       | 6,7,8,9,10,11, 12,13-15   | Moraten                   | Yes | -   | -   | - | -   | -   | -   |
| Job et al., 1991                 | Haiti                       | 6,8                       | Edmonston-Zagreb, Schwarz | -   | -   | -   | - | -   | -   | Yes |
| John et al., 2009                | India                       | 6,6-8,>8,9                | Unknown                   | -   | -   | -   | - | -   | Yes | -   |
| Johnson et al., 1994             | USA                         | 6,15                      | Moraten                   | Yes | -   | -   | - | -   | -   | Yes |
| Judelson et al., 1980            | USA                         | ≤9, >10                   | Unknown                   | -   | -   | -   | - | -   | Yes | -   |
| Kaninda et al., 1998             | Niger                       | 6-8,9                     | Schwarz                   | -   | -   | -   | - | -   | Yes | -   |
| Katiyar et al., 1985             | India                       | 6,7,8,9-12,13-15          | Schwarz                   | Yes | -   | -   | - | -   | -   | -   |
| Khanum et al., 1987              | Bangladesh                  | 3-4,4-5,5-6               | Edmonston-Zagreb, Schwarz | Yes | -   | -   | - | -   | -   | -   |
| Ko et al., 1999                  | England                     | 5                         | Schwarz                   | -   | Yes | -   | - | -   | -   | -   |
| Lee et al., 1983                 | Taiwan                      | 6,7,8,9,10,11, >12        | Moraten                   | Yes | -   | -   | - | -   | -   | -   |
| Lhuillier et al., 1989           | Ivory Coast                 | <7, >8                    | Schwarz                   | -   | -   | -   | - | -   | -   | Yes |
| Mandara et al., 1985             | Tanzania                    | 6-7,8-9,10-11,12-13,14-   | Schwarz                   | Yes | -   | -   | - | -   | -   | -   |

|                            |                  |                                  |                                                          |     |     |     |     |     |     |     |
|----------------------------|------------------|----------------------------------|----------------------------------------------------------|-----|-----|-----|-----|-----|-----|-----|
|                            |                  | 15,16-21                         |                                                          |     |     |     |     |     |     |     |
| Markowitz et al., 1990     | Mexico           | 6,9                              | Edmonston-Zagreb,<br>Edmonston-Zagreb Mexico,<br>Schwarz | Yes | -   | -   | -   | -   | -   | Yes |
| Martins et al., 2008       | Guinea-Bissau    | 4.5,9                            | Edmonston-Zagreb, Schwarz                                | -   | -   | -   | -   | -   | Yes | -   |
| Martins et al., 2014       | Guinea-Bissau    | 4.5,9                            | Edmonston-Zagreb, Schwarz                                | -   | -   | -   | -   | -   | Yes | -   |
| Murray et al, 2000         | Pakistan         | <9, >9                           | Schwartz                                                 | -   | -   | -   | -   | -   | Yes | -   |
| Nair et al., 2007          | USA              | 6,9                              | Moraten                                                  | -   | -   | -   | Yes | -   | -   | -   |
| Ndumbe et al., 1995        | Cameroon         | 3,4,5,6,7,8                      | Connaught,<br>Schwarz                                    | Yes | -   | -   | -   | -   | -   | Yes |
| Njie-Jobe et al., 2012     | Gambia           | 4,9                              | Edmonston-Zagreb                                         | -   | -   | Yes | -   | -   | -   | -   |
| Nkrumah et al., 1998       | Ghana            | 6,9                              | AIK-C, Schwarz                                           | Yes | -   | -   | -   | -   | -   | -   |
| Pabst et al., 1999         | Canada           | 6                                | AIK-C,<br>Connaught                                      | Yes | -   | Yes | -   | -   | -   | -   |
| Pongrithsukda et al., 1991 | Thailand         | 4-7                              | Edmonston-Zagreb                                         | -   | Yes | -   | -   | -   | -   | -   |
| Porter et al., 1990        | Malawi           | 6-9                              | Unknown                                                  | -   | -   | -   | -   | -   | Yes | -   |
| Rogers et al., 1991        | Papua New Guinea | 4,5,6,6-7,7,<8, 8-29             | Edmonston-Zagreb                                         | Yes | -   | -   | -   | -   | -   | -   |
| Schatzmayr et al., 1982    | Brazil           | 7,8,9,10,11,12-14,15-18,16-24,25 | Schwarz                                                  | Yes | -   | -   | -   | -   | -   | -   |
| Semba et al., 1995         | Indonesia        | 6                                | Schwarz                                                  | Yes | -   | -   | -   | -   | -   | -   |
| Shaoyuan et al., 1982      | China            | 4-6,6,7,7-8,8-12,9-10,11-12,>13  | Jing55                                                   | -   | -   | -   | -   | Yes | -   | -   |
| Shasby et al., 1977        | USA              | <9,9-11,12,>13                   | Unknown                                                  | -   | -   | -   | -   | -   | Yes | -   |
| Simba et al., 1995         | Tanzania         | 6-8,>9                           | Unknown                                                  | -   | -   | -   | -   | -   | Yes | -   |
| Soula et al., 1991         | Mali             | 4-8,12-24                        | Schwarz                                                  | -   | -   | -   | -   | -   | -   | Yes |
| Stewien et al., 1978       | Brazil           | 7,8,9,10,11,1                    | Schwarz                                                  | Yes | -   | -   | -   | -   | -   | -   |

|                           |             | 2      |                           |   |     |   |   |     |     |     |
|---------------------------|-------------|--------|---------------------------|---|-----|---|---|-----|-----|-----|
| van der Maas et al., 2017 | Netherlands | <9, 14 | Schwarz                   | - | -   | - | - | -   | -   | Yes |
| Whittle et al., 1988      | Gambia      | 4,5    | Edmonston-Zagreb, Schwarz | - | Yes | - | - | -   | -   | -   |
| Whittle et al., 1990      | Gambia      | 4,9    | Edmonston-Zagreb, Schwarz | - | -   | - | - | Yes | -   | -   |
| Woudenberg et al., 2017   | Netherlands | <9, 14 | Schwarz                   | - | -   | - | - | -   | Yes | -   |

MCV1, first dose of measles containing vaccine; SC, seroconversion; GMT, geometric mean titre

## Proportion seroconverted by age of MCV1 (4-8 months) and measles vaccine strain

Table 6: Proportion seroconverted by age of MCV1 (4-8 months) and measles vaccine strain

| Age of MCV1 (months) | Measles vaccine strain  | %Seroconverted | 95% CI | Author, year                                                                                                                                                             |
|----------------------|-------------------------|----------------|--------|--------------------------------------------------------------------------------------------------------------------------------------------------------------------------|
| 4                    | Connaught               | 59             | 33-82  | Ndumbe et al., 1995                                                                                                                                                      |
|                      | Edmonston-Zagreb        | 67             | 38-88  | Rogers et al., 1991                                                                                                                                                      |
|                      | Schwarz                 | 35             | 21-50  | Anonymous, 1977;<br>Ndumbe et al., 1995                                                                                                                                  |
| 5                    | Connaught               | 76             | 50-93  | Ndumbe et al., 1995                                                                                                                                                      |
|                      | Edmonston-Zagreb        | 83             | 52-98  | Rogers et al., 1991                                                                                                                                                      |
|                      | Schwarz                 | 55             | 39-70  | Anonymous, 1977;<br>Ndumbe et al., 1995                                                                                                                                  |
| 6                    | AIK-C                   | 80             | 64-92  | Bolotovskii et al., 1994;<br>Nkrumah et al., 1998;<br>Pabst et al., 1999                                                                                                 |
|                      | Connaught               | 74             | 74-85  | Ndumbe et al., 1995;<br>Pabst et al., 1999                                                                                                                               |
|                      | Edmonston               | 74             | 58-87  | Ekunwe, 1985;<br>Markowitz et al., 1990;<br>Rogers et al., 1991;<br>Abanamy et al., 1992;<br>Bolotovskii et al., 1994;<br>Cutts et al., 1994                             |
|                      | Edmonston-Zagreb        | 86             | 73-96  | Markowitz et al., 1990;<br>Rogers et al., 1991;<br>Abanamy et al., 1992;<br>Bolotovskii et al., 1994;<br>Cutts et al., 1994                                              |
|                      | Edmonston-Zagreb Mexico | 95             | 92-97  | Markowitz et al., 1990                                                                                                                                                   |
|                      | Leningrad-16            | 76             | 71-81  | Bolotovskii et al., 1994                                                                                                                                                 |
|                      | Moraten                 | 61             | 56-66  | Anonymous, 1982; Job<br>et al., 1984; Johnson et<br>al., 1994; Gans et al.,<br>2013                                                                                      |
|                      | Schwarz                 | 66             | 56-75  | Anonymous, 1977;<br>Katiyar et al., 1985;<br>Markowitz et al., 1990;<br>Abanamy et al., 1992;<br>Bolotovskii et al., 1994;<br>Ndumbe et al., 1995;<br>Semba et al., 1995 |
|                      |                         |                |        |                                                                                                                                                                          |
| 7                    | Connaught               | 67             | 30-93  | Ndumbe et al., 1995                                                                                                                                                      |
|                      | Edmonston               | 75             | 53-90  | Ekunwe, 1985                                                                                                                                                             |
|                      | Edmonston-Zagreb        | 100            | 59-100 | Rogers et al., 1991                                                                                                                                                      |



|          |           |     |        |                                                                                                                                                        |
|----------|-----------|-----|--------|--------------------------------------------------------------------------------------------------------------------------------------------------------|
|          | Moraten   | 87  | 72-96  | Job, et al. 1984                                                                                                                                       |
|          | Schwarz   | 59  | 31-85  | Anonymous, 1977;<br>Stewien, et al., 1978;<br>Schatzmayr, et al., 1982;<br>Katiyar, et al., 1985;<br>Ndumbe, et al., 1995                              |
| <b>8</b> | Connaught | 100 | 29-100 | Ndumbe, et al., 1995                                                                                                                                   |
|          | Edmonston | 89  | 52-100 | Ekunwe, 1985                                                                                                                                           |
|          | Hu-191    | 99  | 95-100 | He, et al., 2014                                                                                                                                       |
|          | Moraten   | 100 | 88-100 | Job et al., 1984                                                                                                                                       |
|          | Schwarz   | 71  | 44-93  | Anonymous, 1977;<br>Stewien, et al., 1978;<br>Schatzmayr, et al., 1982;<br>Katiyar, et al., 1985;<br>Diaz-Ortega, et al., 1986;<br>Ndumbe, et al. 1995 |

# Forest plots for seroconversion

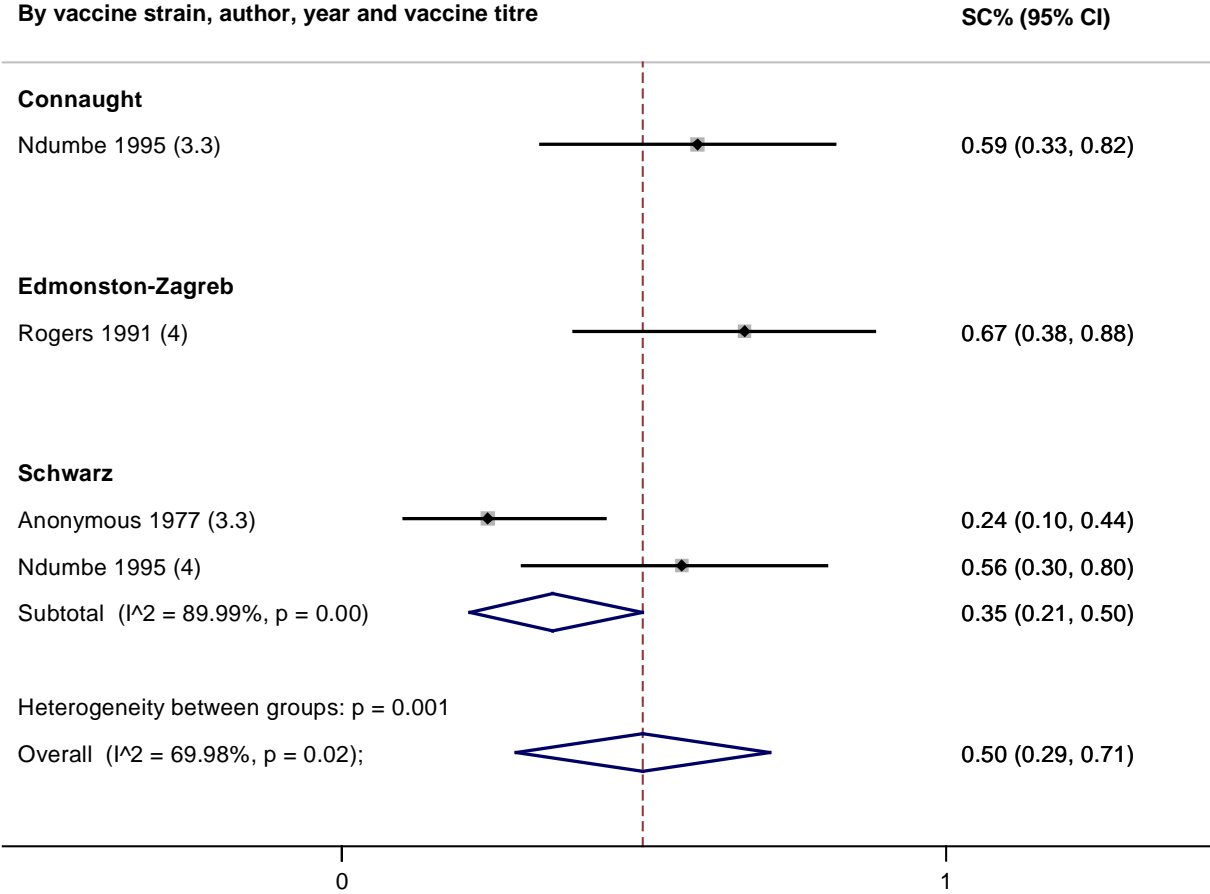

Figure 1: Random effects meta-analysis of the percentage seroconverted after MCV1 in 4-month-old infants. Titres are expressed as TCID<sub>50</sub> unless specified otherwise. SC: seroconversion. CI: confidence interval.

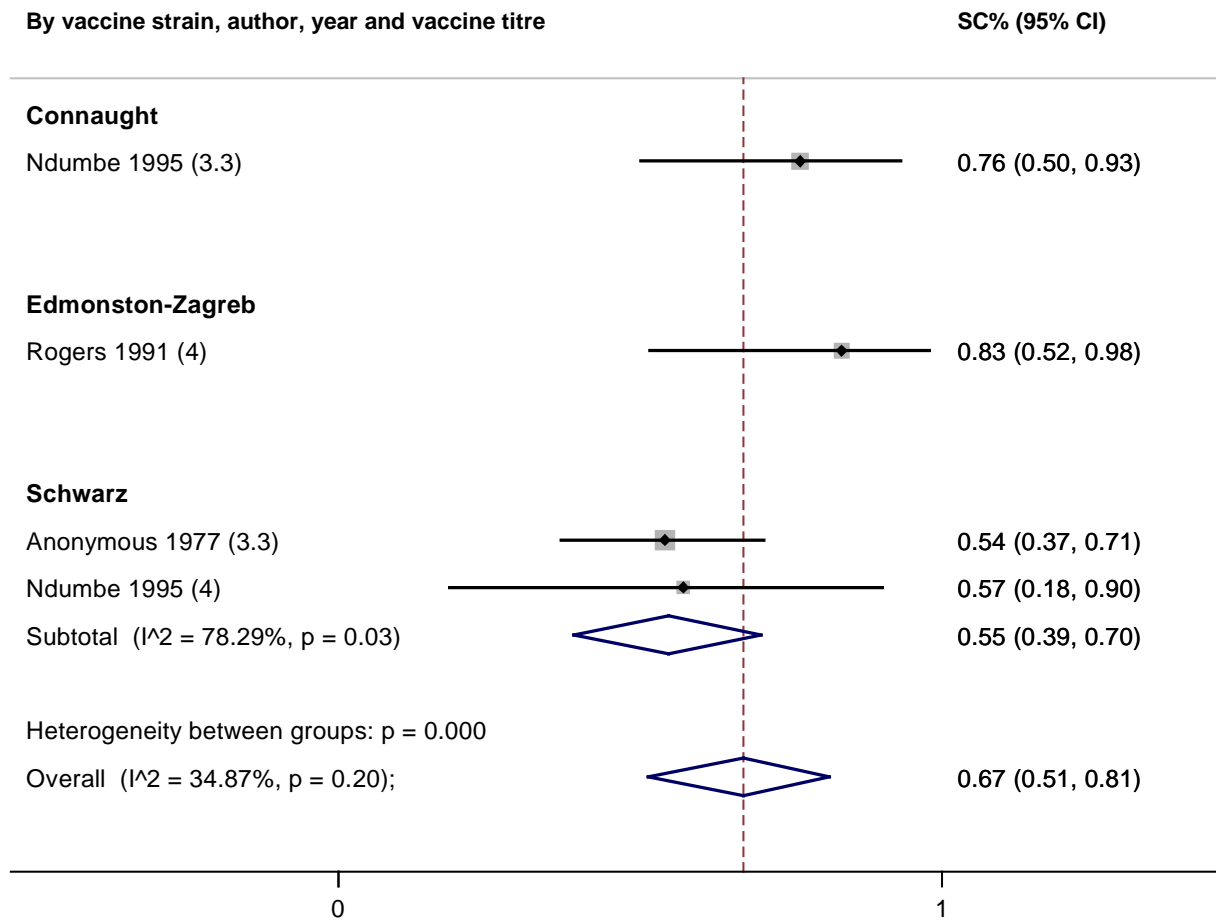

**Figure 2: Random effects meta-analysis of the percentage seroconverted after MCV1 in 5-month-old infants. Titres are expressed as TCID<sub>50</sub> unless specified otherwise. SC: seroconversion. CI: confidence interval.**

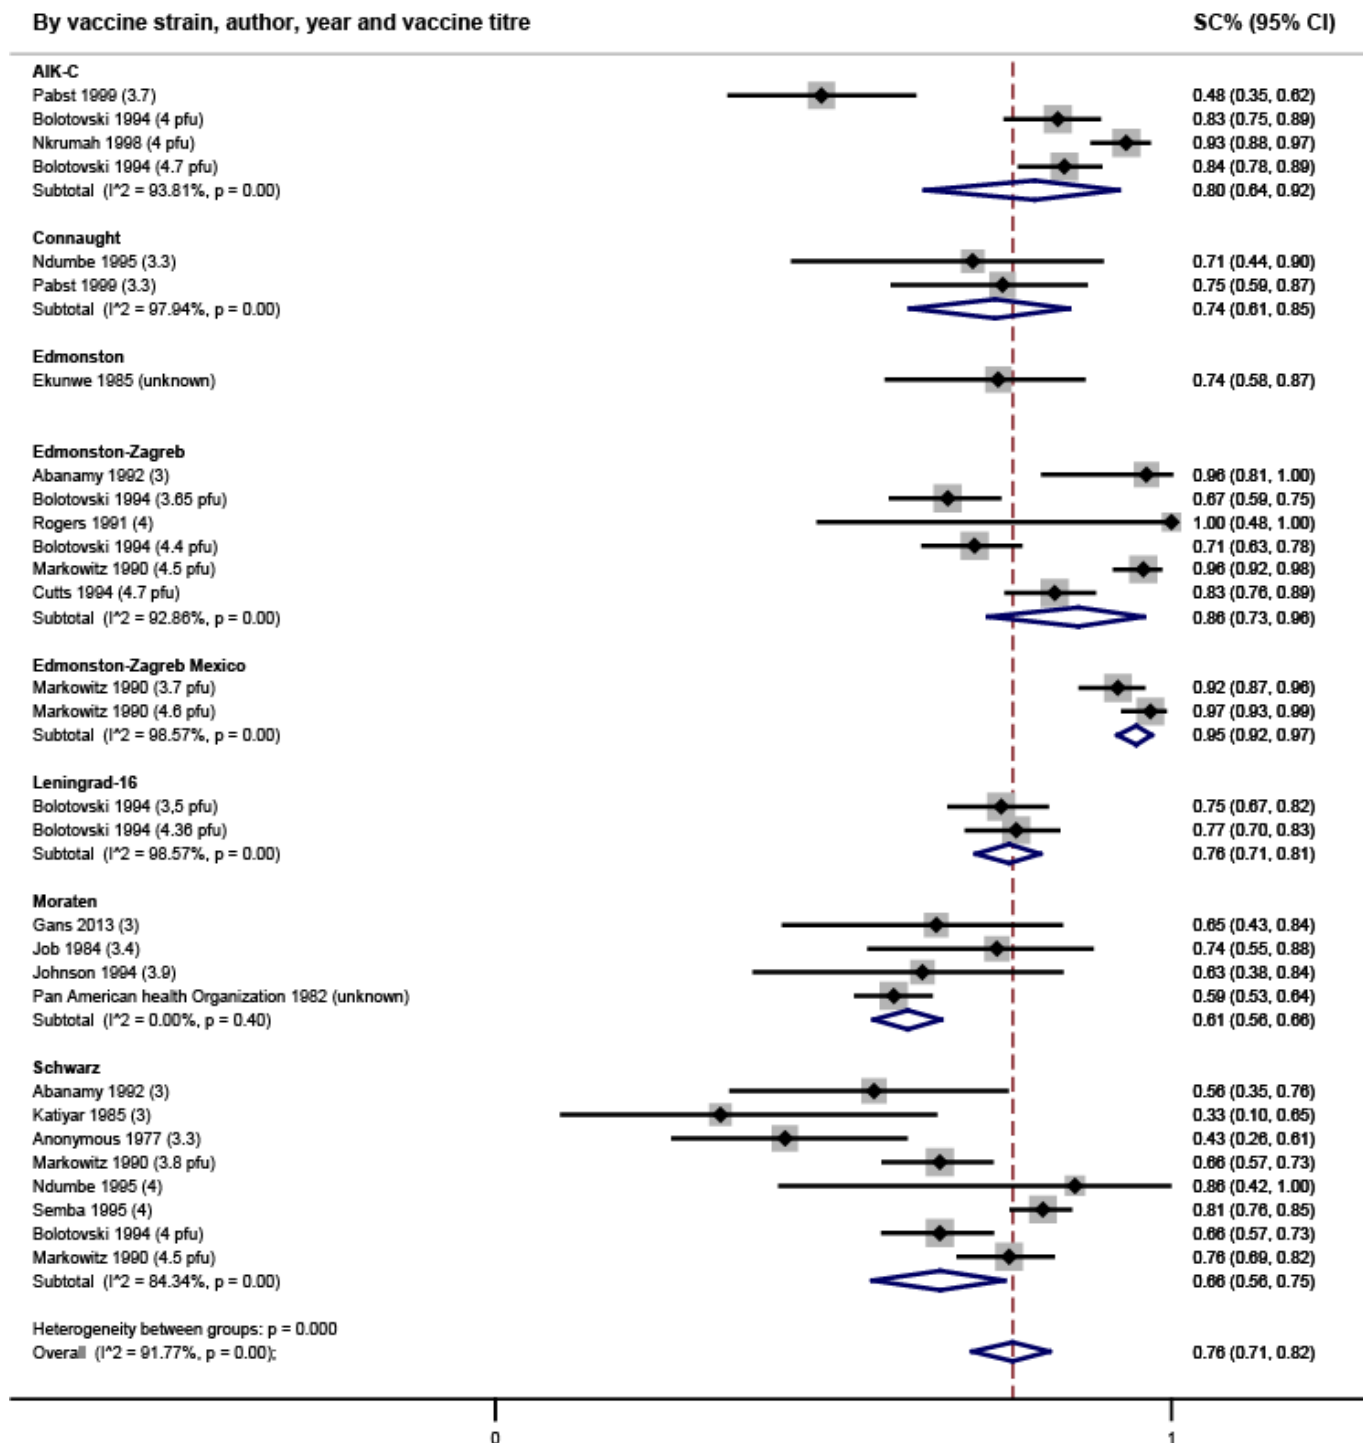

**Figure 3: Random effects meta-analysis of the percentage seroconverted after MCV1 in 6-month-old infants. Titres are expressed as TCID<sub>50</sub> unless specified otherwise. SC: seroconversion. CI: confidence interval.**

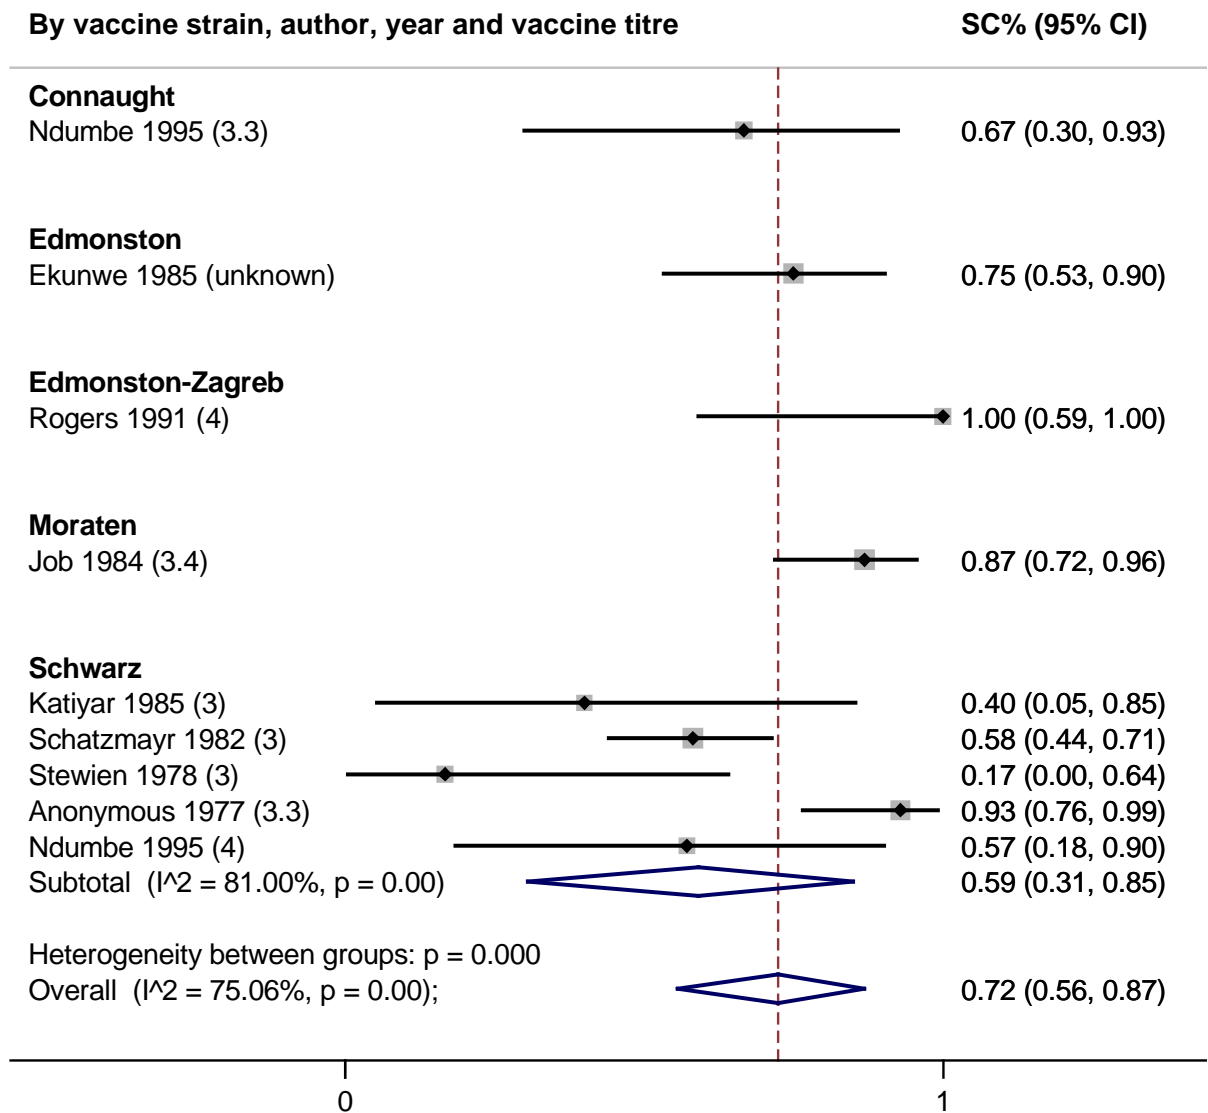

**Figure 4: Random effects meta-analysis of the percentage seroconverted after MCV1 in 7-month-old infants. Titres are expressed as TCID<sub>50</sub> unless specified otherwise. SC: seroconversion. CI: confidence interval.**

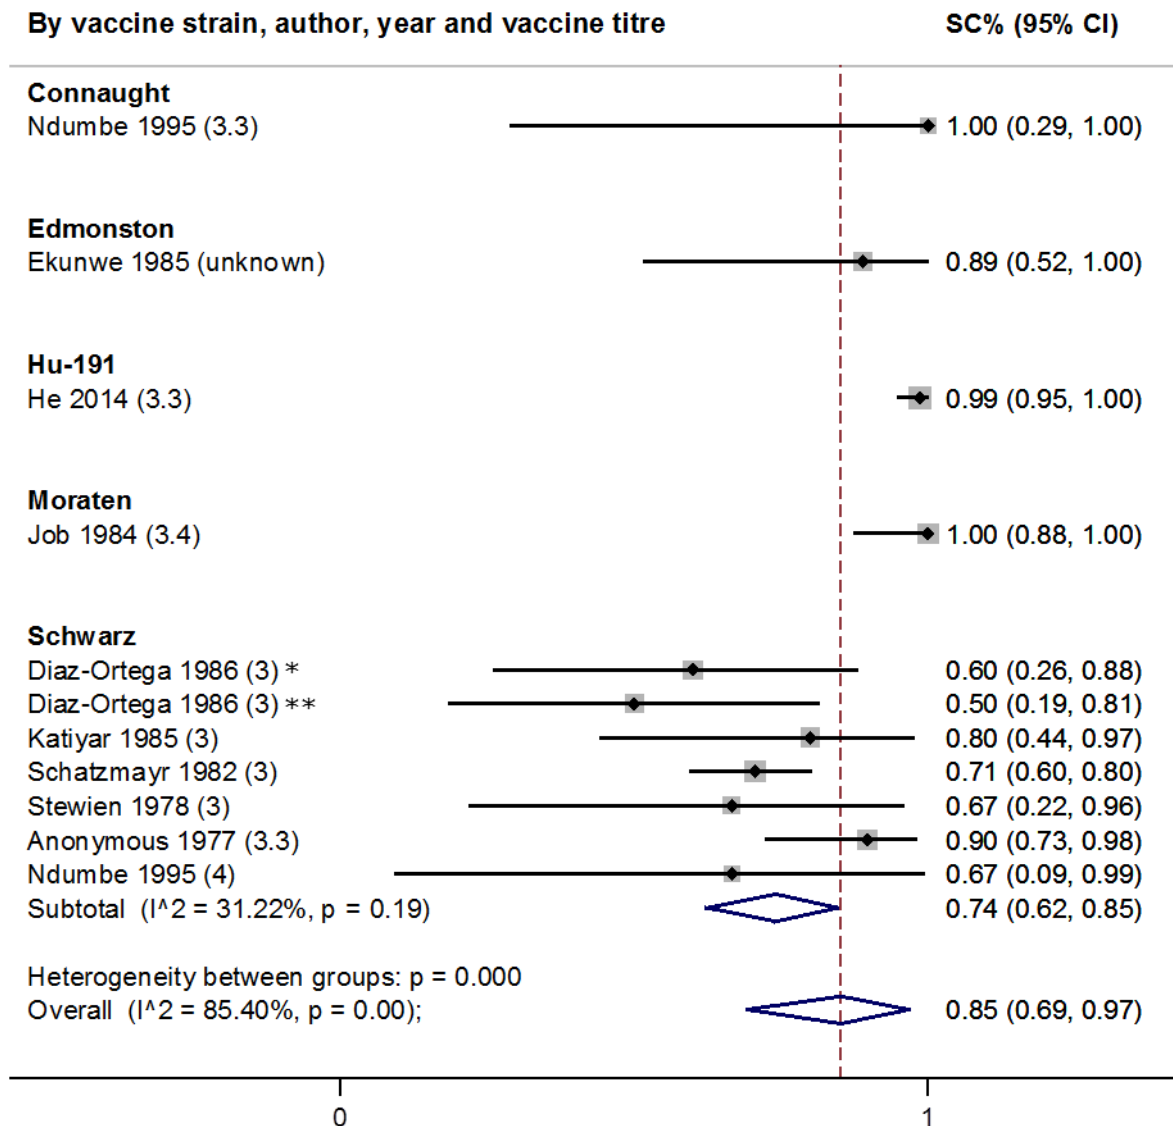

**Figure 5: Random effects meta-analysis of the percentage seroconverted after MCV1 in 8-month-old infants. Titres are expressed as TCID<sub>50</sub> unless specified otherwise. SC: seroconversion. CI: confidence interval.**

Diaz-Ortega 1986 examined two Schwarz vaccines (3 TCID<sub>50</sub>) from \*RIT and \*\*Mérieux

### Proportion seroconverted, pooled estimates per single ages and age ranges

Table 7: Sensitivity analysis of the proportion seroconverted following MCV1 <9 months pooled from meta-analysis with corresponding 95% confidence intervals (95% CI) and number of included studies presented as age ranges: a) several single ages, b) data presented as age ranges, c) a and b combined.

| Age of MCV1 (months) | Seroconverted % | 95% CI | Number of studies | Author, year                                                                                                                                                                                                                                                                                                                                                                                                                                                                                                                                                                               |
|----------------------|-----------------|--------|-------------------|--------------------------------------------------------------------------------------------------------------------------------------------------------------------------------------------------------------------------------------------------------------------------------------------------------------------------------------------------------------------------------------------------------------------------------------------------------------------------------------------------------------------------------------------------------------------------------------------|
| a) 4-5 (single)      | 58              | 44-72  | 3                 | Anonymous, 1977; Ndumbe <i>et al.</i> , 1995; Rogers <i>et al.</i> , 1991                                                                                                                                                                                                                                                                                                                                                                                                                                                                                                                  |
| b) 3-5 (age ranges)  | 55              | 41-69  | 2                 | Anonymous, 1981; Khanum <i>et al.</i> , 1987                                                                                                                                                                                                                                                                                                                                                                                                                                                                                                                                               |
| c) 3-5 (combined)    | 56              | 46-66  | 5                 | Anonymous, 1977; Anonymous, 1981; Khanum <i>et al.</i> , 1987; Ndumbe <i>et al.</i> , 1995; Rogers <i>et al.</i> , 1991                                                                                                                                                                                                                                                                                                                                                                                                                                                                    |
| a) 6-8 (single)      | 78              | 73-82  | 20                | Abanamy <i>et al.</i> , 1992; Anonymous 1977; Bolotovskii <i>et al.</i> , 1994; Cutts <i>et al.</i> , 1994; Diaz-Ortega <i>et al.</i> , 1986; Ekunwe <i>et al.</i> , 1985; Gans <i>et al.</i> , 2013; He <i>et al.</i> , 2014; Job <i>et al.</i> , 1984; Johnson <i>et al.</i> , 1994; Katiyar <i>et al.</i> , 1985; Markowitz <i>et al.</i> , 1990; Ndumbe <i>et al.</i> , 1995; Nkrumah <i>et al.</i> , 1998; Pabst <i>et al.</i> , 1999; Pan American Health Organization, 1982; Rogers 1991; Schatzmayr <i>et al.</i> , 1982; Semba <i>et al.</i> , 1995; Stewien <i>et al.</i> , 1978 |
| b) 6-8 (age ranges)  | 65              | 50-79  | 4                 | Anonymous, 1981; Carson <i>et al.</i> , 1995; Fernandez de Castro <i>et al.</i> , 1986; Mandara <i>et al.</i> , 1985                                                                                                                                                                                                                                                                                                                                                                                                                                                                       |
| c) 6-8 (combined)    | 76              | 72-81  | 24                | Abanamy <i>et al.</i> , 1992; Anonymous 1977; Anonymous, 1981; Bolotovskii <i>et al.</i> , 1994; Carson <i>et al.</i> , 1995;                                                                                                                                                                                                                                                                                                                                                                                                                                                              |

Cutts et al., 1994; Diaz-Ortega et al., 1986; Ekunwe et al., 1985; Fernandez de Castro et al., 1986; Gans et al., 2013; He et al., 2014; Job et al., 1984; Johnson et al., 1994; Katiyar et al., 1985; Mandara et al., 1985; Markowitz et al., 1990; Ndumbe et al., 1995; Nkrumah et al., 1998; Pabst et al., 1999; Pan American Health Organization, 1982; Rogers et al., 1991; Schatzmayr et al., 1982; Semba et al., 1995; Stewien et al., 1978



## Univariable meta-regression results for seroconversion

**Table 8: Univariable meta-regression model of the association between seroconversion after MCV1 <9 months and age, vaccine strain, vaccine titre, decade of data collection, continent of study and type of test (N=57 observations from 20 publications)**

| Independent variable                    | Coefficient | 95% CI      |             | P value |
|-----------------------------------------|-------------|-------------|-------------|---------|
|                                         |             | Lower limit | Upper limit |         |
| <b>Age at MCV1 (months)</b>             | 0.0616      | 0.0047      | 0.1185      | 0.034   |
| <b><u>Vaccine strain</u></b>            |             |             |             |         |
| Schwarz                                 | Reference   | -           | -           | -       |
| Edmonston-Zagreb                        | 0.1410      | 0.0155      | 0.2665      | 0.029   |
| Edmonston-Zagreb Mexico                 | 0.2798      | 0.1075      | 0.4520      | 0.002   |
| AIK-C                                   | 0.1475      | 0.0075      | 0.2876      | 0.039   |
| Moraten                                 | 0.0299      | -0.1205     | 0.1803      | 0.691   |
| Edmonston                               | 0.1013      | -0.1627     | 0.3653      | 0.444   |
| Leningrad-16                            | 0.0942      | -0.0780     | 0.2664      | 0.277   |
| Connaught                               | 0.0532      | -0.1678     | 0.2742      | 0.63    |
| Hu191                                   | 0.3205      | 0.0825      | 0.5584      | 0.009   |
| <b><u>Vaccine titre</u></b>             |             |             |             |         |
| <b>Log titre (either pfu or TCID)</b>   | 0.1054      | 0.0187      | 0.1920      | 0.018   |
| <b><u>Decade of data collection</u></b> |             |             |             |         |
| 1970s                                   | Reference   | -           | -           | -       |
| 1980s                                   | 0.1007      | -0.0917     | 0.2930      | 0.299   |
| 1990s                                   | 0.2025      | 0.0301      | 0.3749      | 0.022   |
| 2010s                                   | 0.3343      | 0.0743      | 0.5943      | 0.013   |
| <b><u>Continent of study</u></b>        |             |             |             |         |
| Africa                                  | Reference   | -           | -           | -       |
| Asia                                    | 0.0504      | -0.0701     | 0.1708      | 0.405   |
| North America                           | 0.0569      | -0.0778     | 0.1915      | 0.401   |
| South America                           | -0.1237     | -0.2991     | 0.0516      | 0.163   |
| <b><u>Type of test</u></b>              |             |             |             |         |
| PRNT                                    | Reference   | -           | -           | -       |
| ELISA                                   | -0.0037     | -0.1665     | 0.1590      | 0.964   |
| HIA                                     | -0.0757     | -0.1803     | 0.0289      | 0.152   |
| Other test                              | -0.1684     | -0.3355     | -0.0014     | 0.048   |

TCID<sub>50</sub>, 50% Tissue Culture Infective Dose; pfu, plaque-forming unit; PRNT, plaque reduction neutralization testing; ELISA, enzyme-linked immunosorbent assay; HIA, hemagglutination inhibition assay

## Multivariable meta-regression results for seroconversion

Table 9. Multivariable meta-regression model of the association between seroconversion after MCV1 <9 months and age, vaccine strain, and vaccine titre. (N=53 observations from 20 publications)

| Independent variable              | Coefficient | 95% CI      |             | P value |
|-----------------------------------|-------------|-------------|-------------|---------|
|                                   |             | Lower limit | Upper limit |         |
| Age at MCV1 (months)              | 0.0863      | 0.0220      | 0.1505      | 0.010   |
| <b>Vaccine strain<sup>1</sup></b> |             |             |             |         |
| Schwarz                           | Reference   | -           | -           | -       |
| Edmonston-Zagreb                  | 0.0868      | -0.0340     | 0.2076      | 0.155   |
| Edmonston-Zagreb<br>Mexico        | 0.2314      | 0.0766      | 0.3862      | 0.004   |
| AIK-C                             | 0.1052      | -0.0250     | 0.2353      | 0.110   |
| Moraten                           | 0.1236      | -0.0668     | 0.3139      | 0.197   |
| Leningrad-16                      | 0.0742      | -0.0766     | 0.2250      | 0.326   |
| Connaught                         | 0.1460      | -0.0748     | 0.3668      | 0.189   |
| Hu191                             | 0.2108      | -0.0225     | 0.4440      | 0.075   |
| <b>Vaccine titre</b>              |             |             |             |         |
| Log titre (either pfu or TCID)    | 0.1296      | 0.0352      | 0.2241      | 0.008   |

<sup>1</sup>Edmonston strain was dropped because titre information was missing  
TCID<sub>50</sub>, 50% Tissue Culture Infective Dose; pfu, plaque-forming unit; PRNT, plaque reduction neutralization testing; ELISA, enzyme-linked immunosorbent assay; HIA, hemagglutination inhibition assay

# Proportion seroconverted head-to-head comparison of 6-month-old infants vaccinated with Schwarz or Edmonston-Zagreb

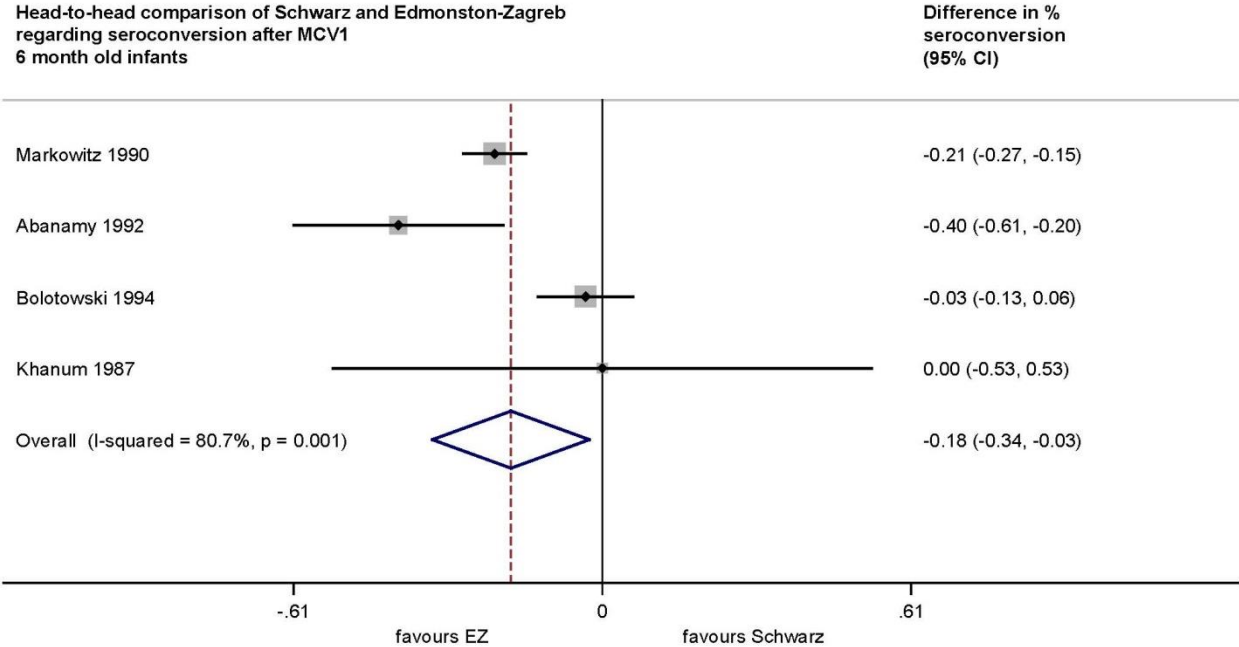

Figure 6: Random effects meta-analysis of the difference in proportion seroconverted after either Edmonston-Zagreb or Schwarz strain vaccination at 6 months of age. CI: confidence interval. EZ: Edmonston-Zagreb.

**Forest plot with geometric mean titre (GMT) results from plaque reduction neutralization testing (PRNT) with accompanying confidence intervals or standard errors following MCV1 <9 months of age**

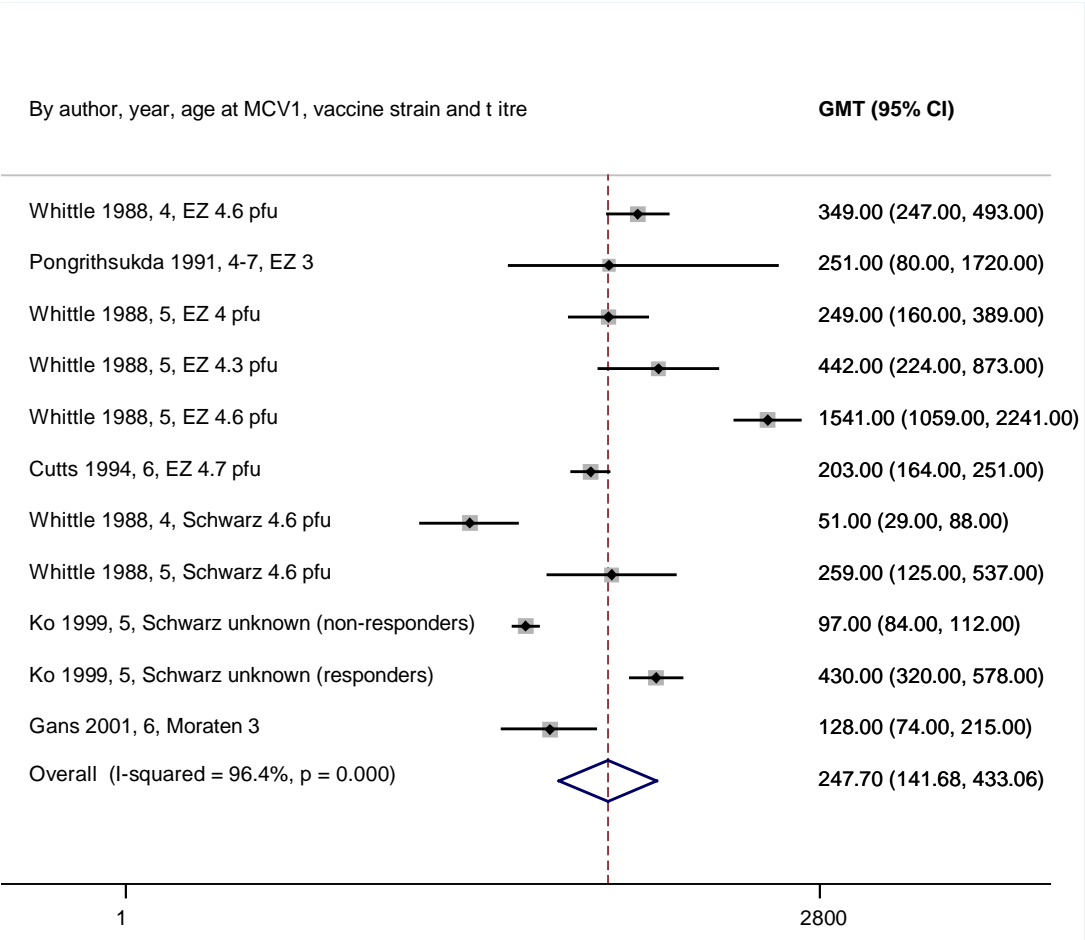

**Figure 7: Random effects meta-analysis geometric mean titres with plaque reduction neutralization testing (PRNT) after MCV1 in infants aged <9 months. Titres are expressed as TCID<sub>50</sub> unless specified otherwise. GMT: geometric mean titre. CI: confidence interval.**

## Forest plots for safety

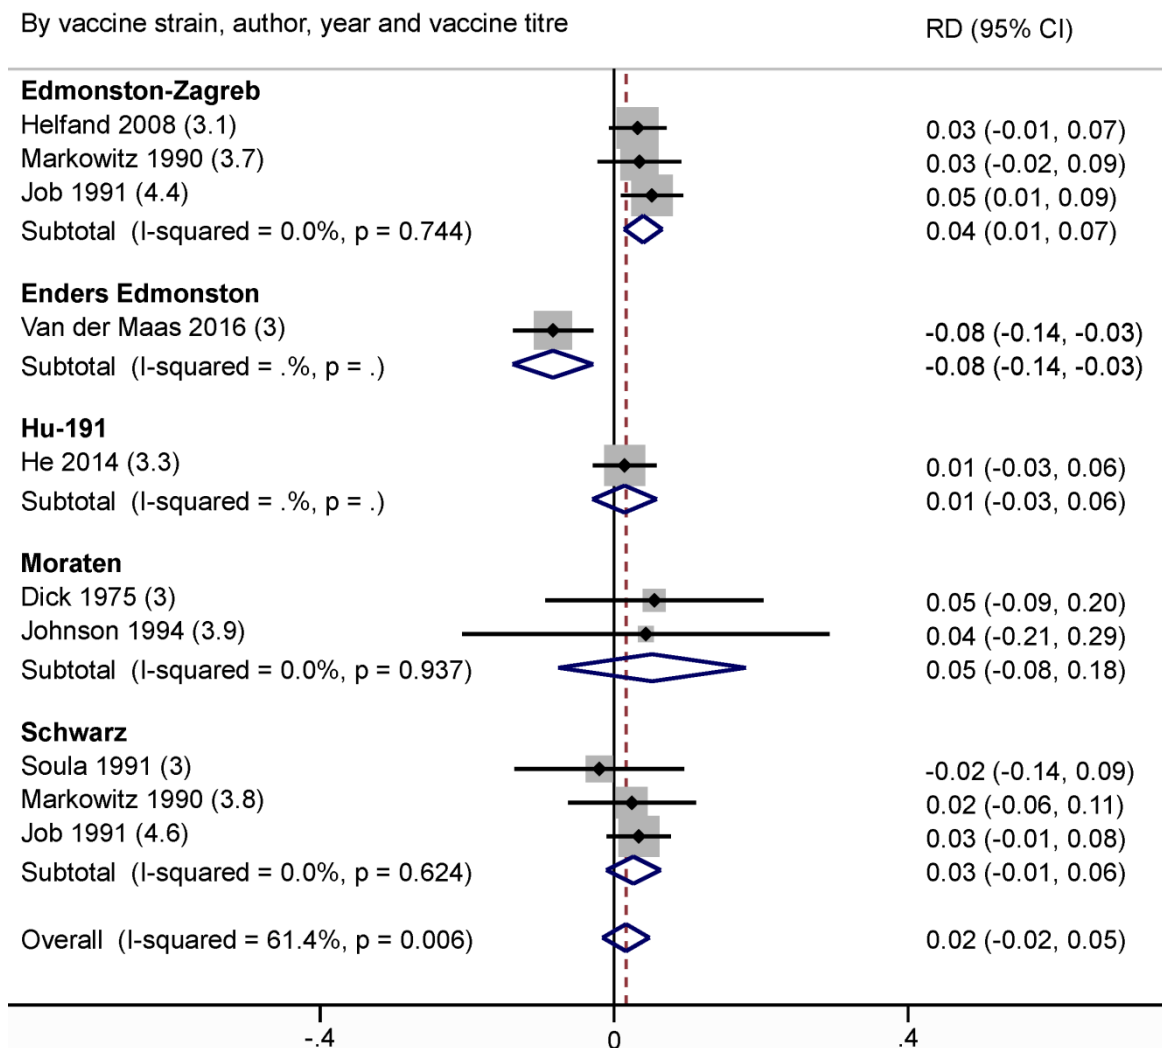

**Figure 8: Random effects meta-analysis of within-study comparisons of fever after MCV1 in infants aged  $\geq$  or  $<9$  months. Titres are expressed as TCID<sub>50</sub> unless specified otherwise. RD: risk difference. CI: confidence interval. A positive risk difference indicates a higher risk in infants  $<9$  months of age.**

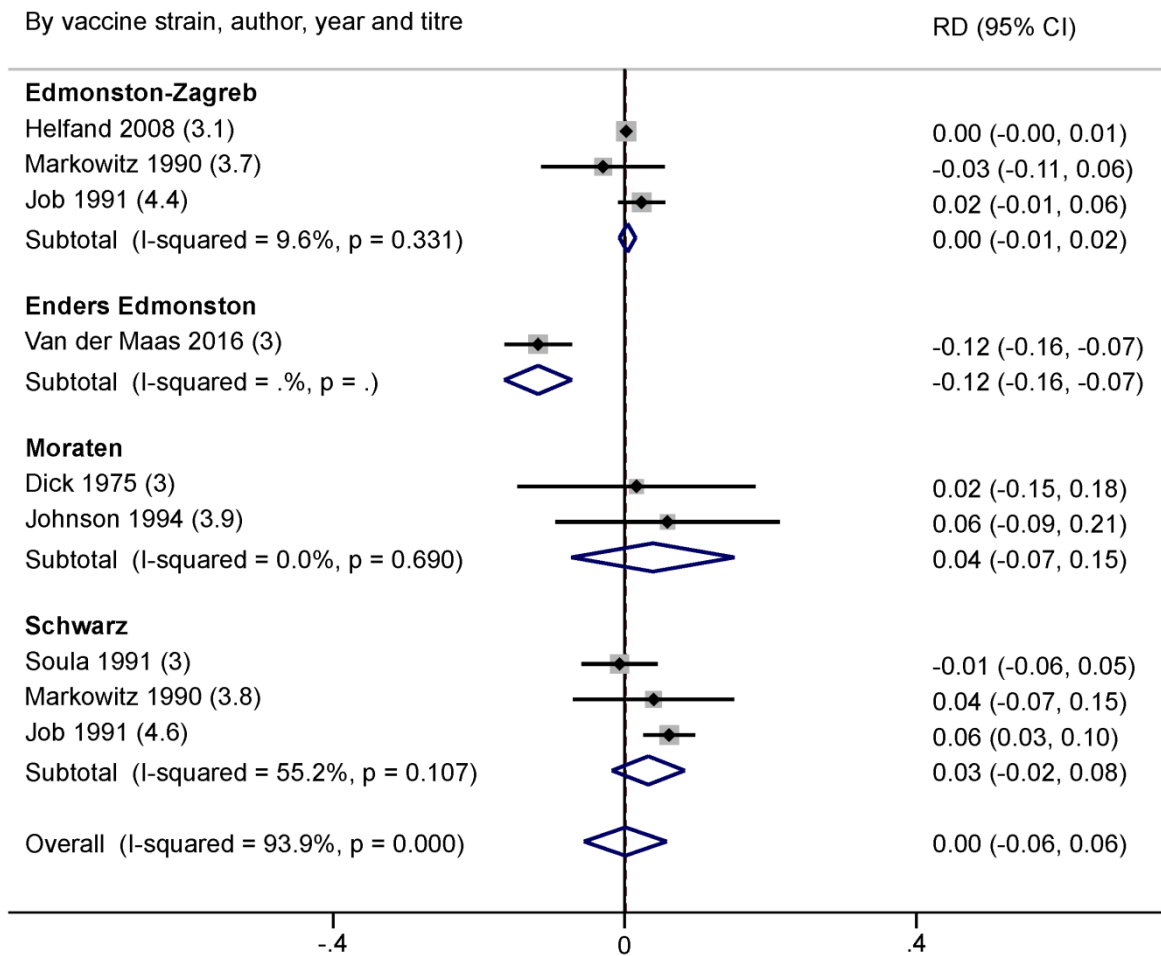

**Figure 9: Random effects meta-analysis of within-study comparisons of rash after MCV1 in infants aged  $\geq$  or  $<$ 9 months. Titres are expressed as TCID<sub>50</sub> unless specified otherwise. RD: risk difference. CI: confidence interval. A positive risk difference indicates a higher risk in infants  $<$ 9 months of age.**

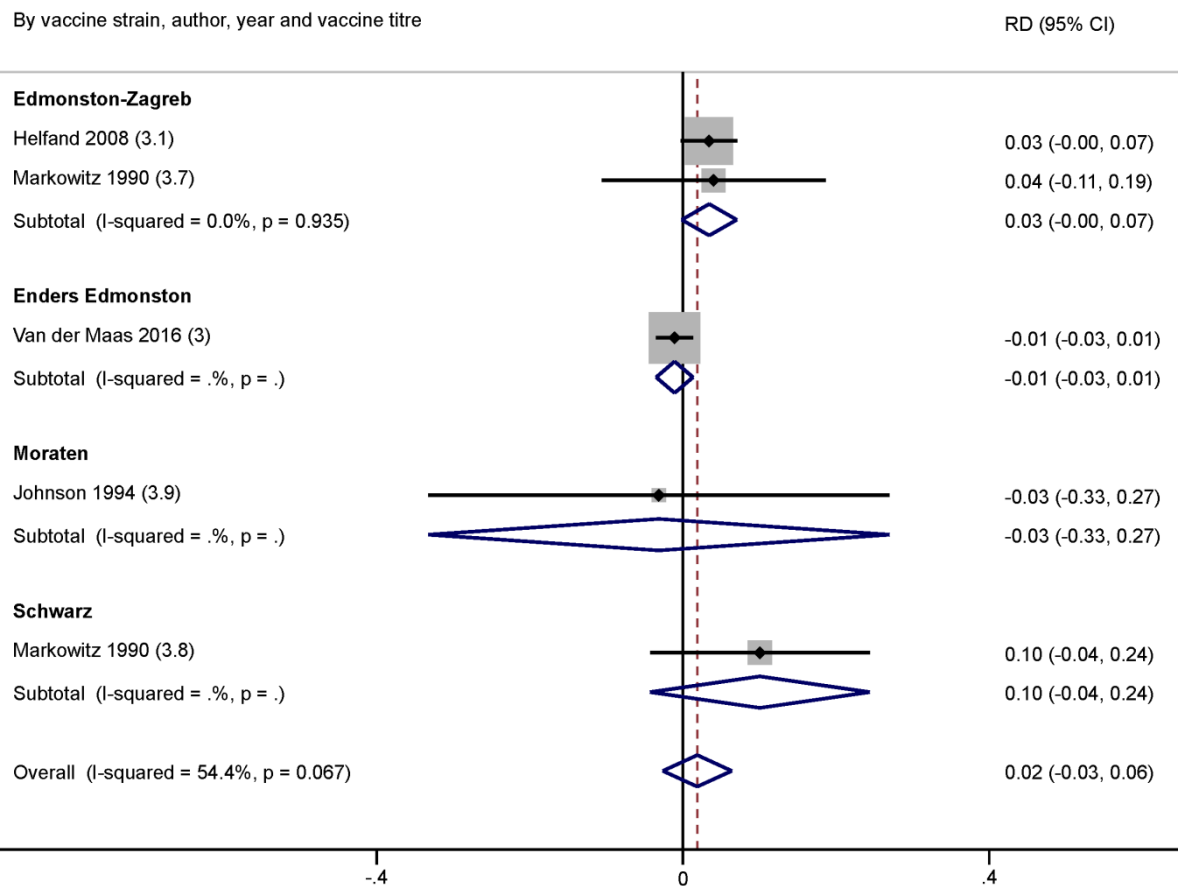

**Figure 10: Random effects meta-analysis of within-study comparisons of diarrhoea after MCV1 in infants aged  $\geq$  or  $<$ 9 months. Titres are expressed as TCID<sub>50</sub> unless specified otherwise. RD: risk difference. CI: confidence interval. A positive risk difference indicates a higher risk in infants  $<$ 9 months of age.**

By vaccine strain, author, year and vaccine titre

RD (95% CI)

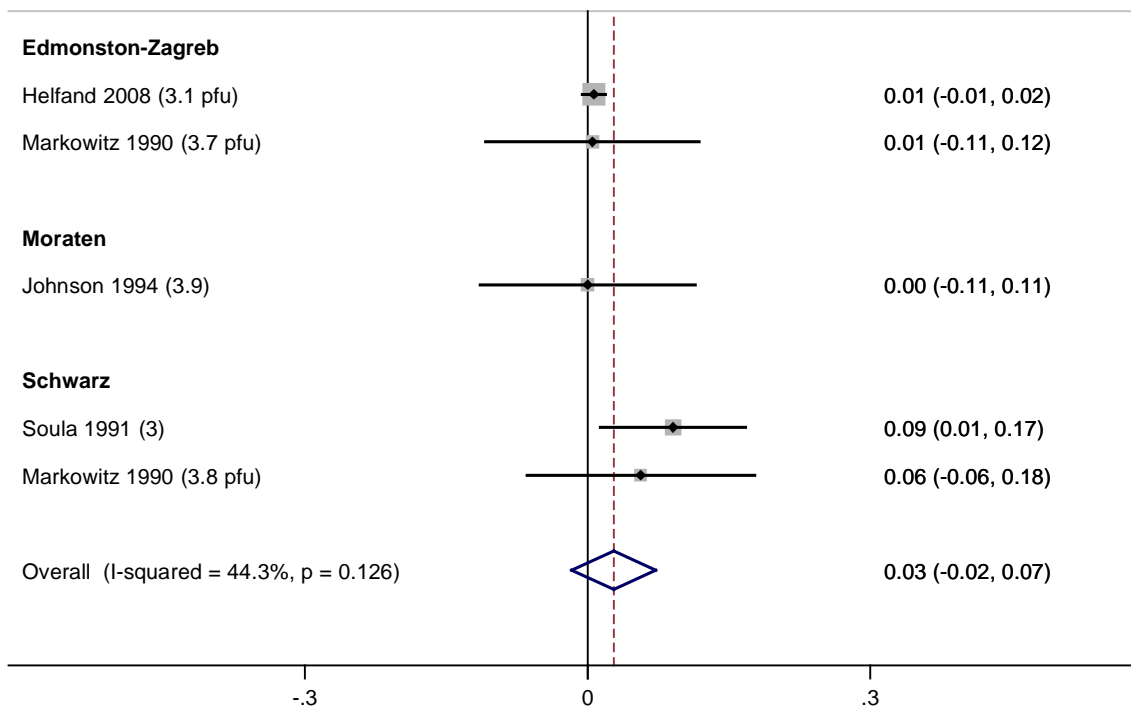

**Figure 11: Random effects meta-analysis of within-study comparisons of conjunctivitis after MCV1 in infants aged  $\geq$  or  $<$ 9 months. Titres are expressed as TCID<sub>50</sub> unless specified otherwise. RD: risk difference. CI: confidence interval. A positive risk difference indicates a higher risk in infants  $<$ 9 months of age.**



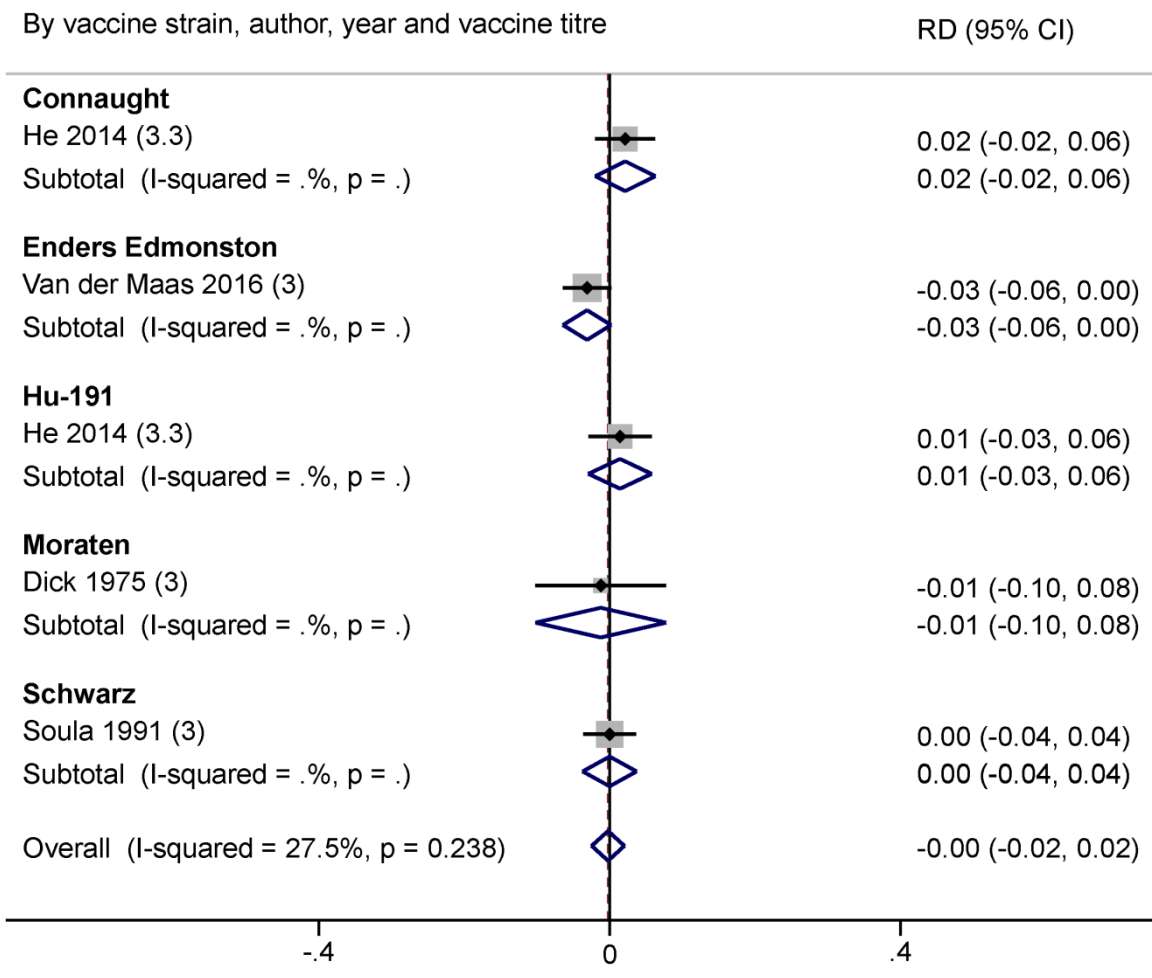

Figure 12: Random effects meta-analysis of within-study comparisons of local reactions at the injection site (redness, swelling) after MCV1 in infants aged  $\geq$  or  $<9$  months. Titres are expressed as TCID<sub>50</sub> unless specified otherwise. RD: risk difference. CI: confidence interval. A positive risk difference indicates a higher risk in infants  $<9$  months of age.

## GRADE summary of evidence table

Table 10: GRADE summary of evidence table

| Quality assessment                     |               |                                  |                          |                         |                        |                                                                                                           | Summary of findings |         |                   |          | Quality          | Importance |
|----------------------------------------|---------------|----------------------------------|--------------------------|-------------------------|------------------------|-----------------------------------------------------------------------------------------------------------|---------------------|---------|-------------------|----------|------------------|------------|
| No of studies                          | Design        | Limitations                      | Inconsistency            | Indirectness            | Imprecision            | Other considerations                                                                                      | No of patients      |         | Effect            |          |                  |            |
|                                        |               |                                  |                          |                         |                        |                                                                                                           | Intervention        | Control | Relative (95% CI) | Absolute |                  |            |
| <b>Immunogenicity</b>                  |               |                                  |                          |                         |                        |                                                                                                           |                     |         |                   |          |                  |            |
| 23                                     | Observational | No serious limitations           | No serious inconsistency | No serious indirectness | Serious <sup>1</sup>   | Many studies had high loss to follow-up. Dose-response gradients for age and seroconversion.              | #                   | #       | #                 | #        | ⊕⊕○○<br>Low      | IMPORTANT  |
| 12                                     | RCT           | No serious limitations           | No serious inconsistency | No serious indirectness | Serious <sup>1</sup>   | Lack of methodological information.                                                                       | #                   | #       | #                 | #        | ⊕⊕⊕○<br>Moderate | IMPORTANT  |
| <b>Duration of immunity</b>            |               |                                  |                          |                         |                        |                                                                                                           |                     |         |                   |          |                  |            |
| 2                                      | Observational | No serious limitations           | No serious inconsistency | No serious indirectness | No serious imprecision | Very few studies available.                                                                               | #                   | #       | #                 | #        | ⊕⊕○○<br>Low      | IMPORTANT  |
| 1                                      | RCT           | No serious limitations           | No serious inconsistency | No serious indirectness | No serious imprecision | Lack of methodological information.                                                                       | #                   | #       | #                 | #        | ⊕⊕⊕○<br>Moderate | IMPORTANT  |
| <b>Vaccine effectiveness/ efficacy</b> |               |                                  |                          |                         |                        |                                                                                                           |                     |         |                   |          |                  |            |
| 9                                      | Observational | Serious limitations <sup>2</sup> | No serious inconsistency | No serious indirectness | Serious <sup>1</sup>   | Very few studies available. Heterogeneity between studies.                                                | #                   | #       | #                 | #        | ⊕○○○<br>Very low | IMPORTANT  |
| 2                                      | RCT           | No serious limitations           | No serious inconsistency | No serious indirectness | No serious imprecision | Lack of methodological information.                                                                       | #                   | #       | #                 | #        | ⊕⊕⊕○<br>Moderate | IMPORTANT  |
| <b>Safety</b>                          |               |                                  |                          |                         |                        |                                                                                                           |                     |         |                   |          |                  |            |
| 5                                      | Observational | Serious limitations <sup>3</sup> | No serious inconsistency | No serious indirectness | No serious imprecision | In many studies, clear case definitions (e.g. for fever) are lacking.                                     | #                   | #       | #                 | #        | ⊕○○○<br>Very low | IMPORTANT  |
| 10                                     | RCT           | Serious limitations <sup>3</sup> | No serious inconsistency | No serious indirectness | No serious imprecision | Lack of methodological information. In many studies, clear case definitions (e.g. for fever) are lacking. | #                   | #       | #                 | #        | ⊕⊕○○<br>Low      | IMPORTANT  |

1: very wide confidence intervals;

2: mainly due to lack of laboratory confirmation of measles cases;

3: most studies lack an unvaccinated control group of the same age; this is important for safety results because fever and rash occur more often in younger infants due to other causes.

#: summary estimates per intervention or control group are not applicable

## Multivariable meta-regression results for seroconversion in the absence or presence of maternal antibodies

Table 11. Multivariable meta-regression of the association between seroconversion after MCV1 <9 months in the absence or presence of maternal antibodies, adjusted for age. (N=66 observations from 16 publications)

| Independent variable              | Coefficient | 95% CI      |             | P value |
|-----------------------------------|-------------|-------------|-------------|---------|
|                                   |             | Lower limit | Upper limit |         |
| Age at MCV1 (months)              | 0.0689      | 0.0164      | 0.1213      | 0.011   |
| <b><u>Maternal antibodies</u></b> |             |             |             |         |
| Absence of maternal antibodies    | Reference   | -           | -           | -       |
| Presence maternal antibodies      | -0.3317     | -0.4557     | -0.2078     | <0.001  |
